# Supplementary material for: Iron-Catalyzed Cross-Coupling Reactions of Alkyl Grignards with Aryl Chlorobenzenesulfonates
Source: MDPI journal article supplement (doi:10.3390/molecules26195895), 2021-09-29

# **Iron-Catalyzed Cross-Coupling Reactions of Alkyl Grignards with Aryl Chlorobenzenesulfonates**

Elwira Bisz<sup>\*,†</sup>

<sup>†</sup>*Department of Chemistry, Opole University, 48 Oleska Street, 45-052 Opole, Poland*

ebisz@uni.opole.pl

## **Supporting Information**

### **Table of Contents**

SI-1

<sup>1</sup>H and <sup>13</sup>C NMR Spectra

SI-2

### **Corresponding Author:**

Dr. E. Bisz

Department of Chemistry, Opole University

48 Oleska Street, 45-052 Opole, Poland

E-mail: ebisz@uni.opole.pl

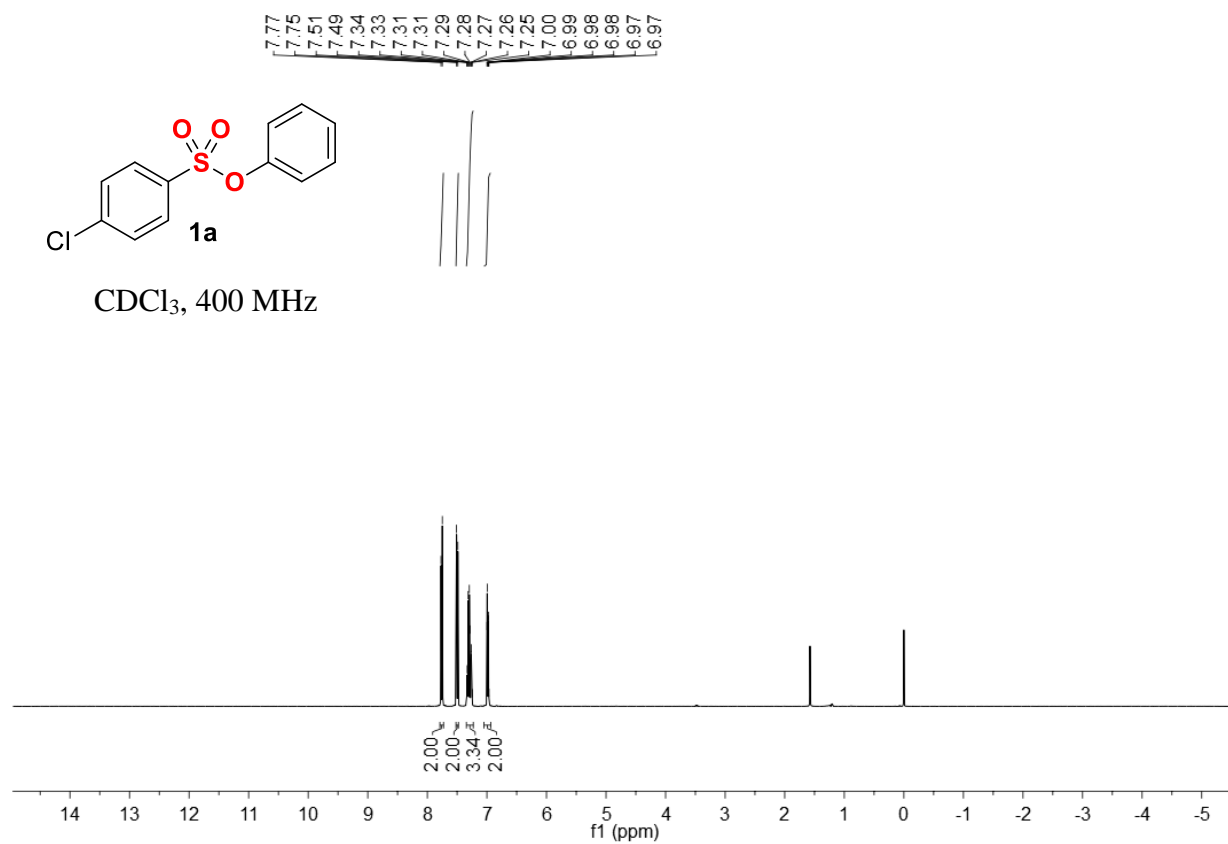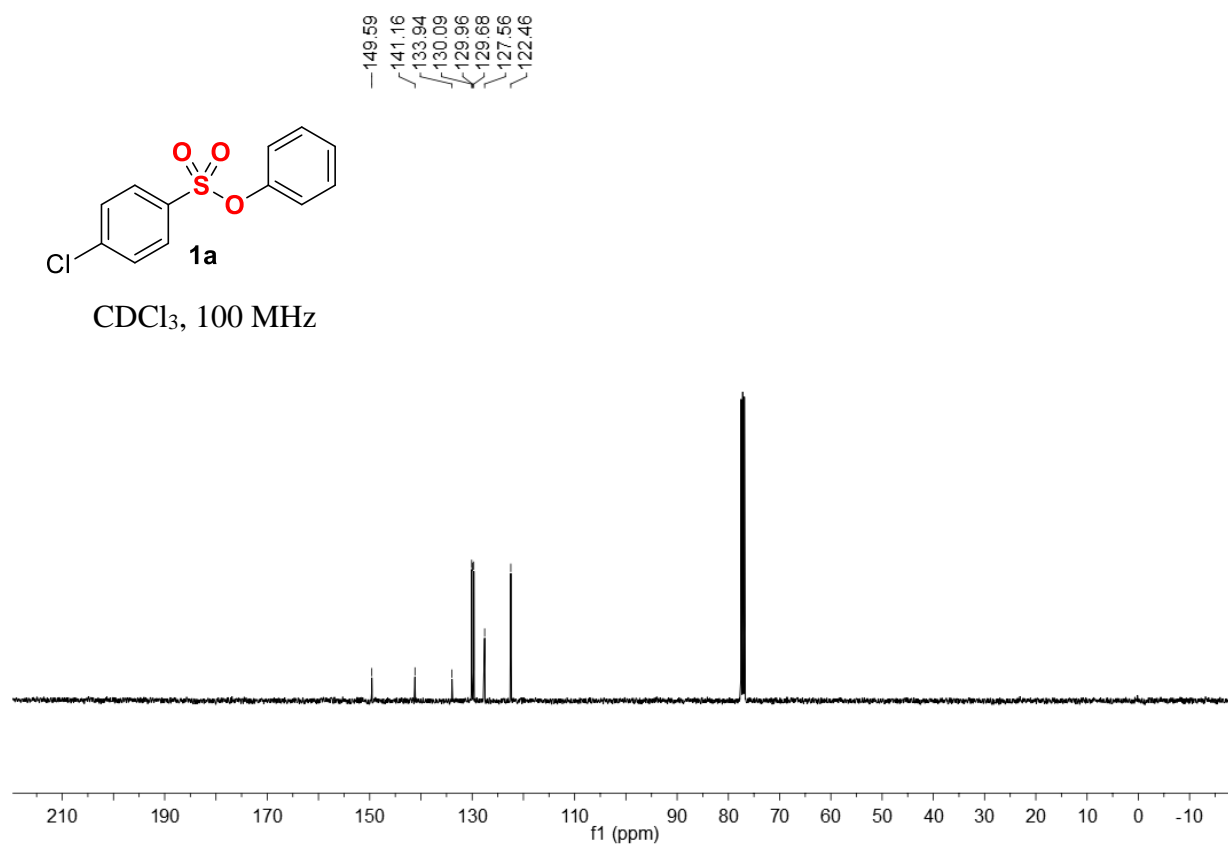

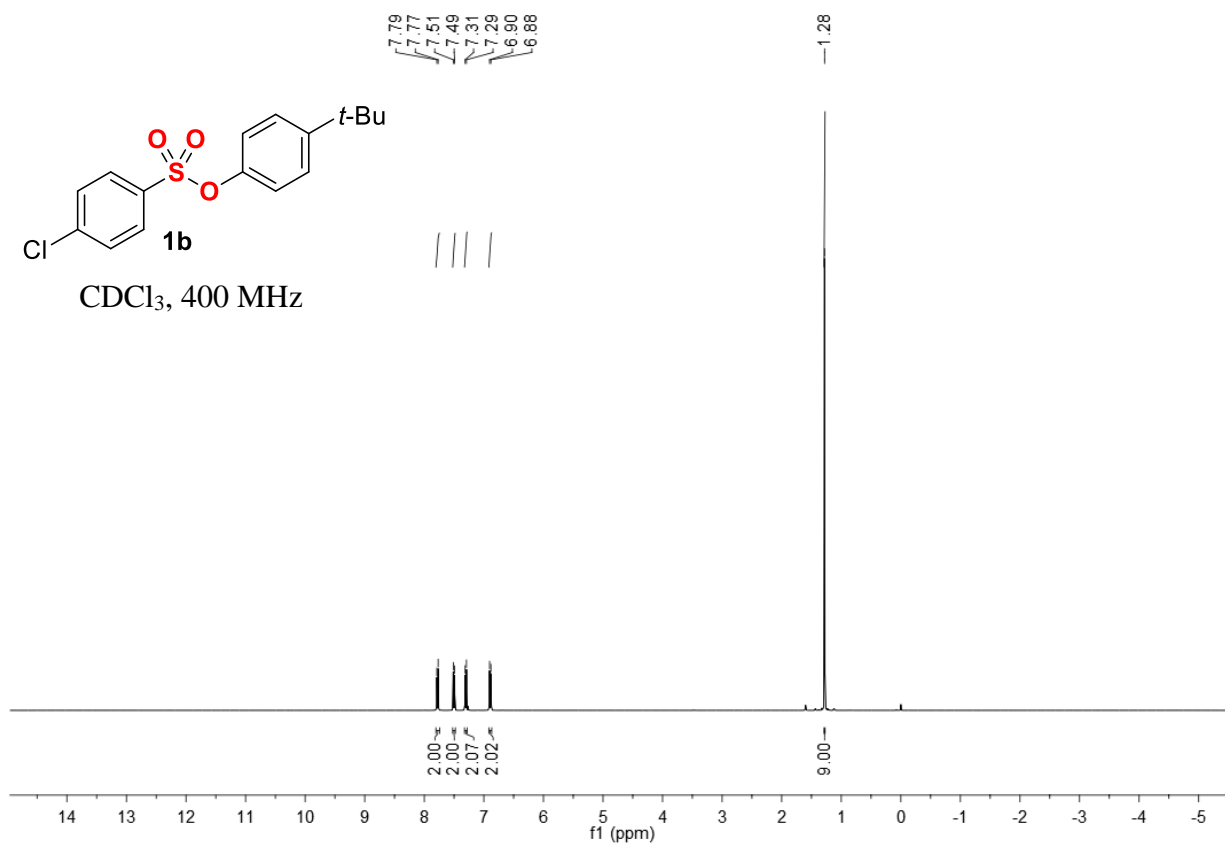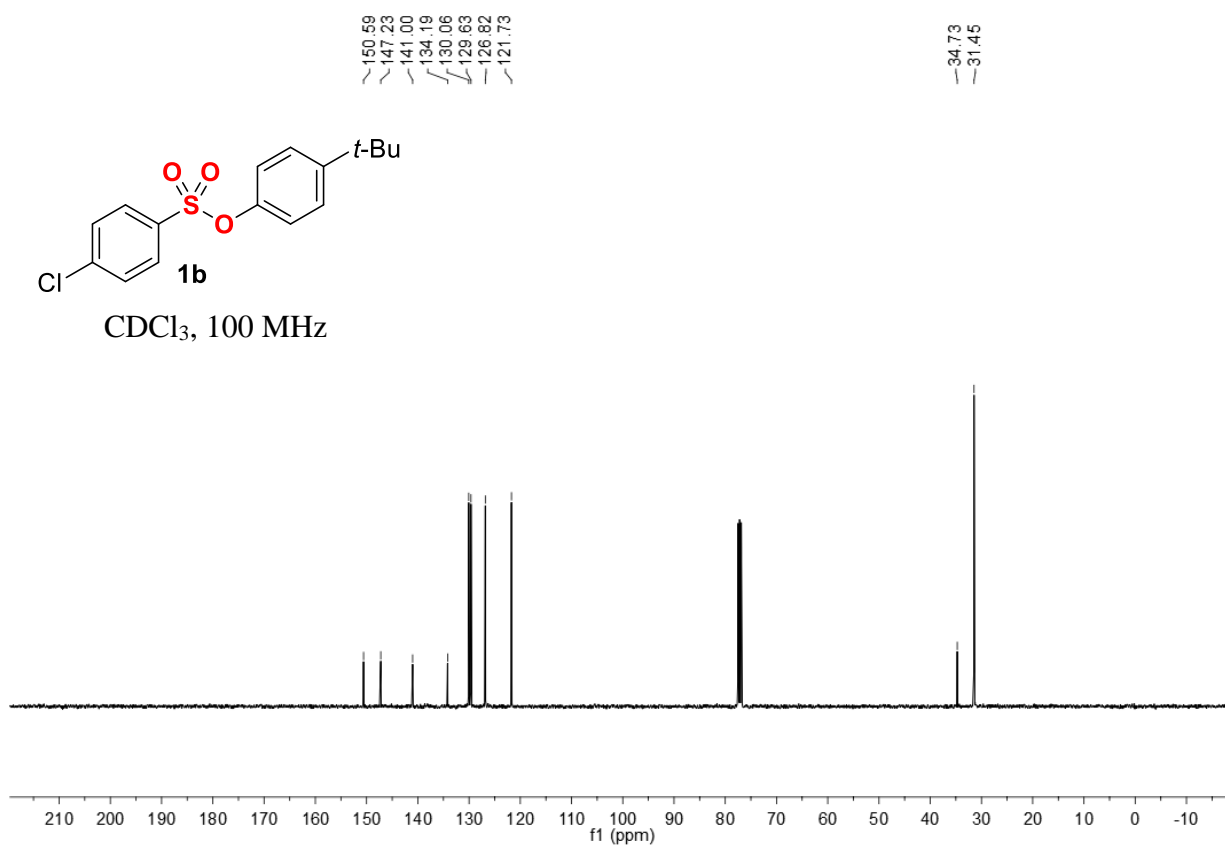

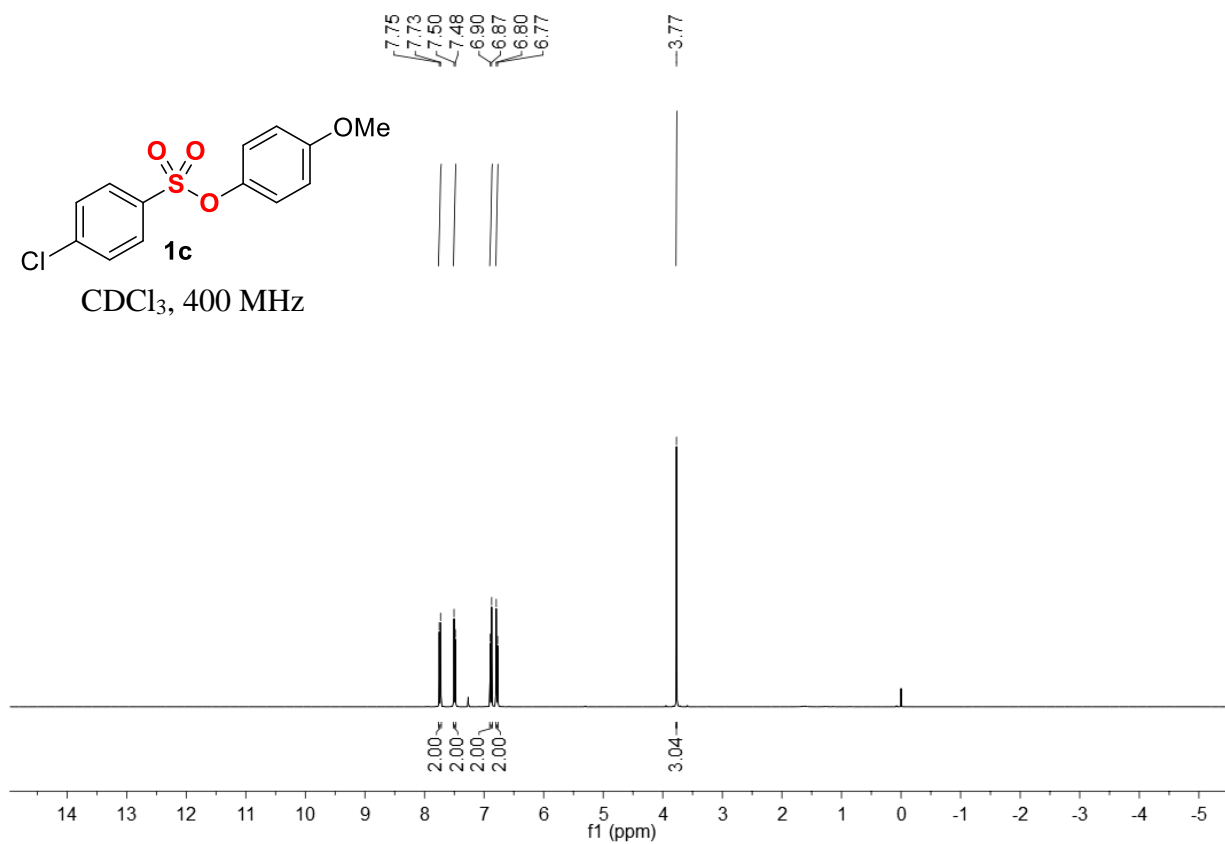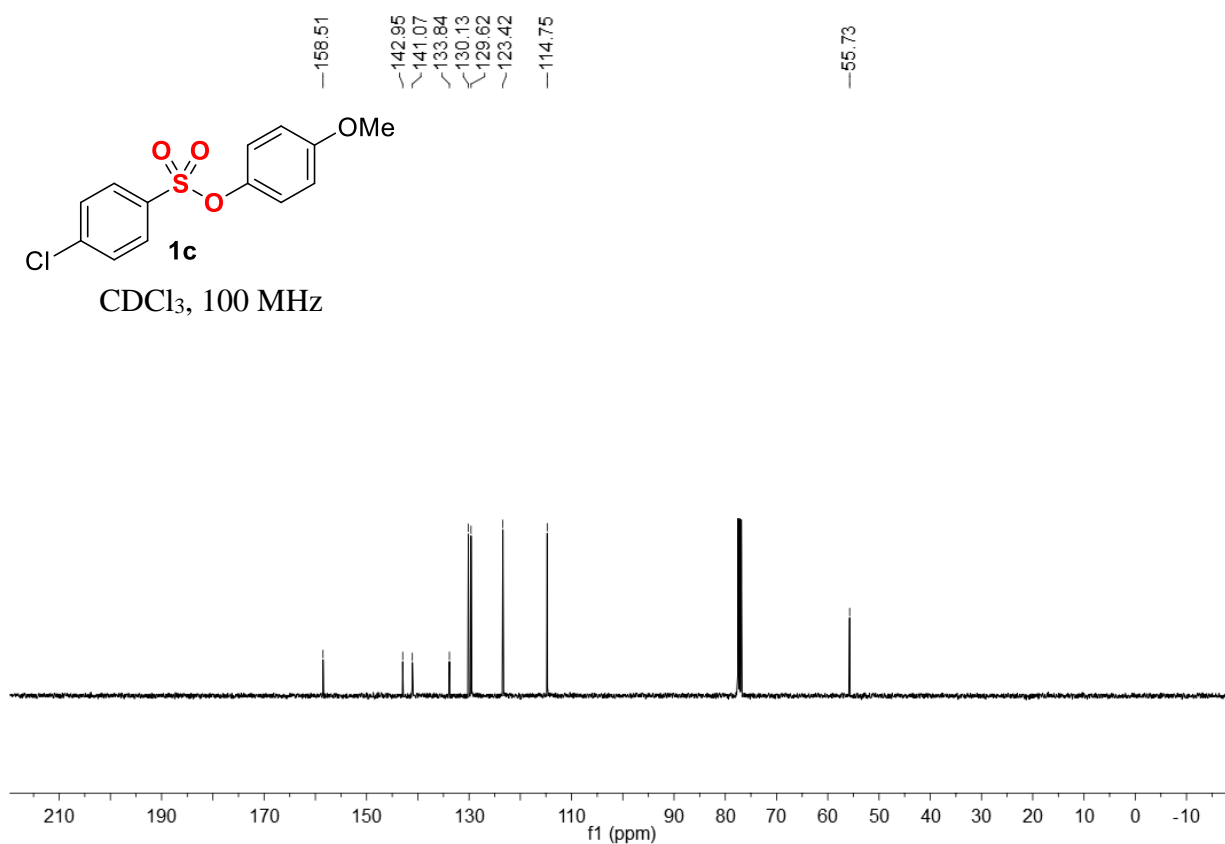

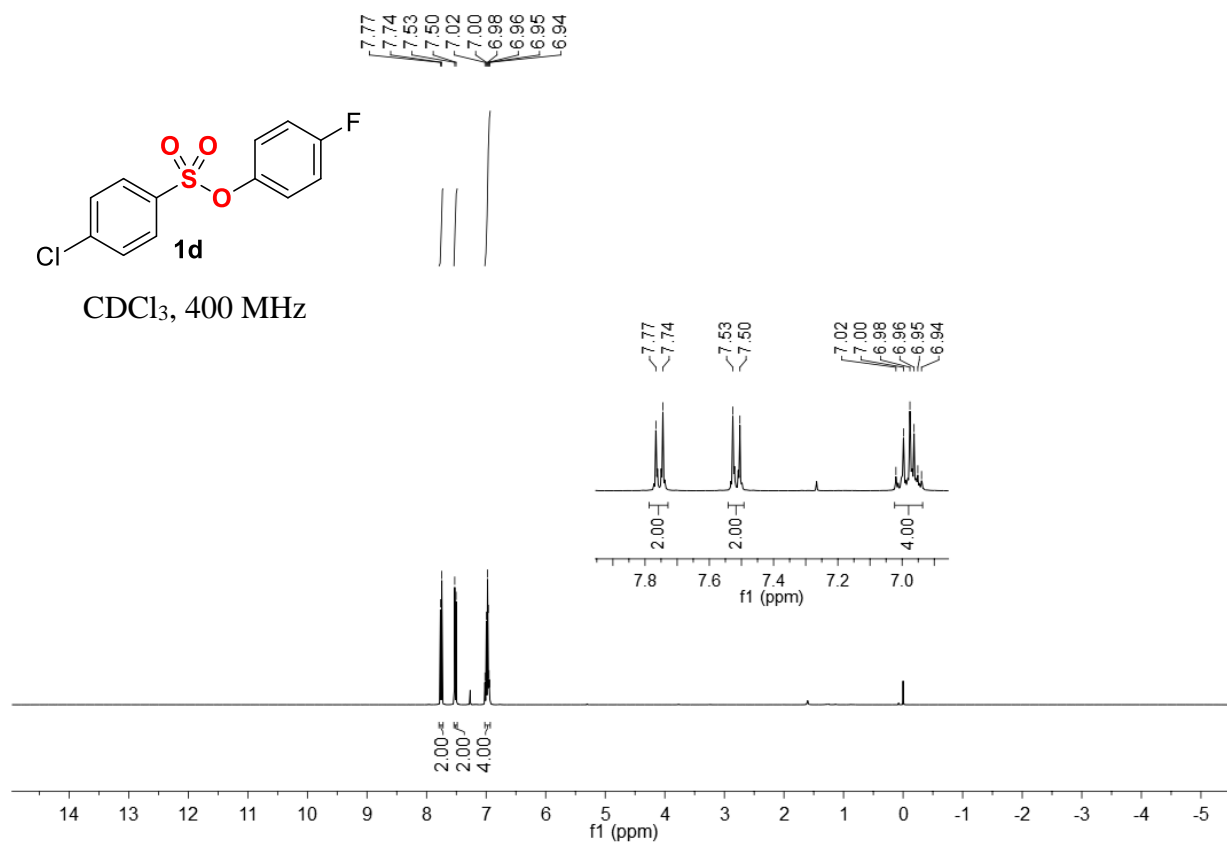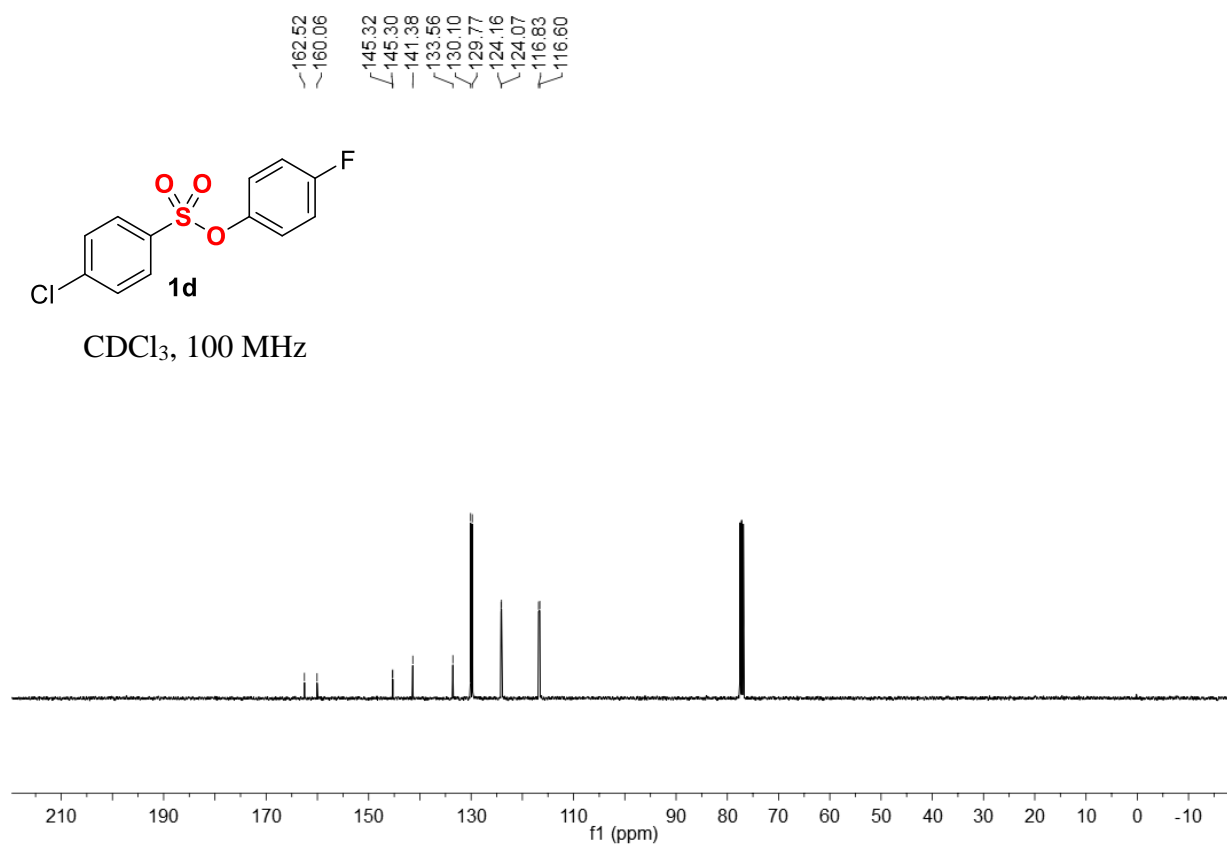

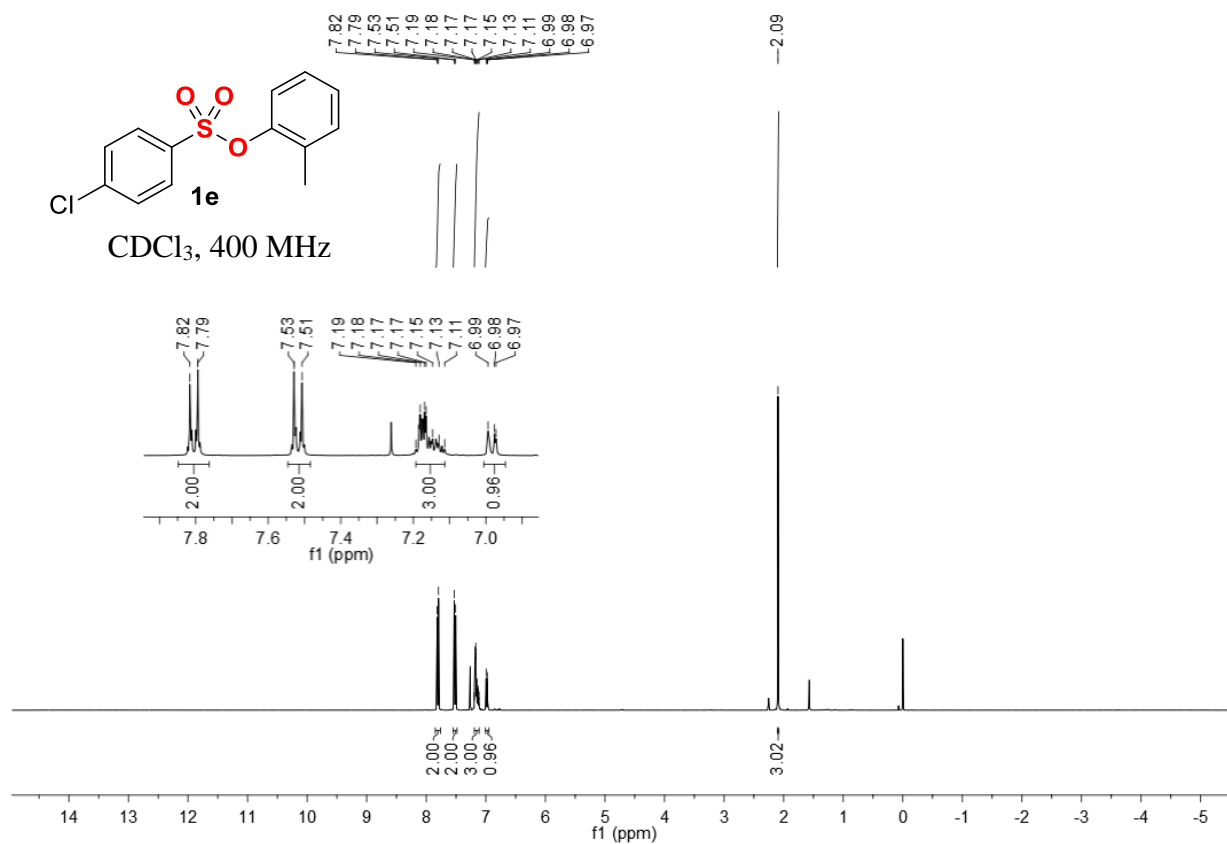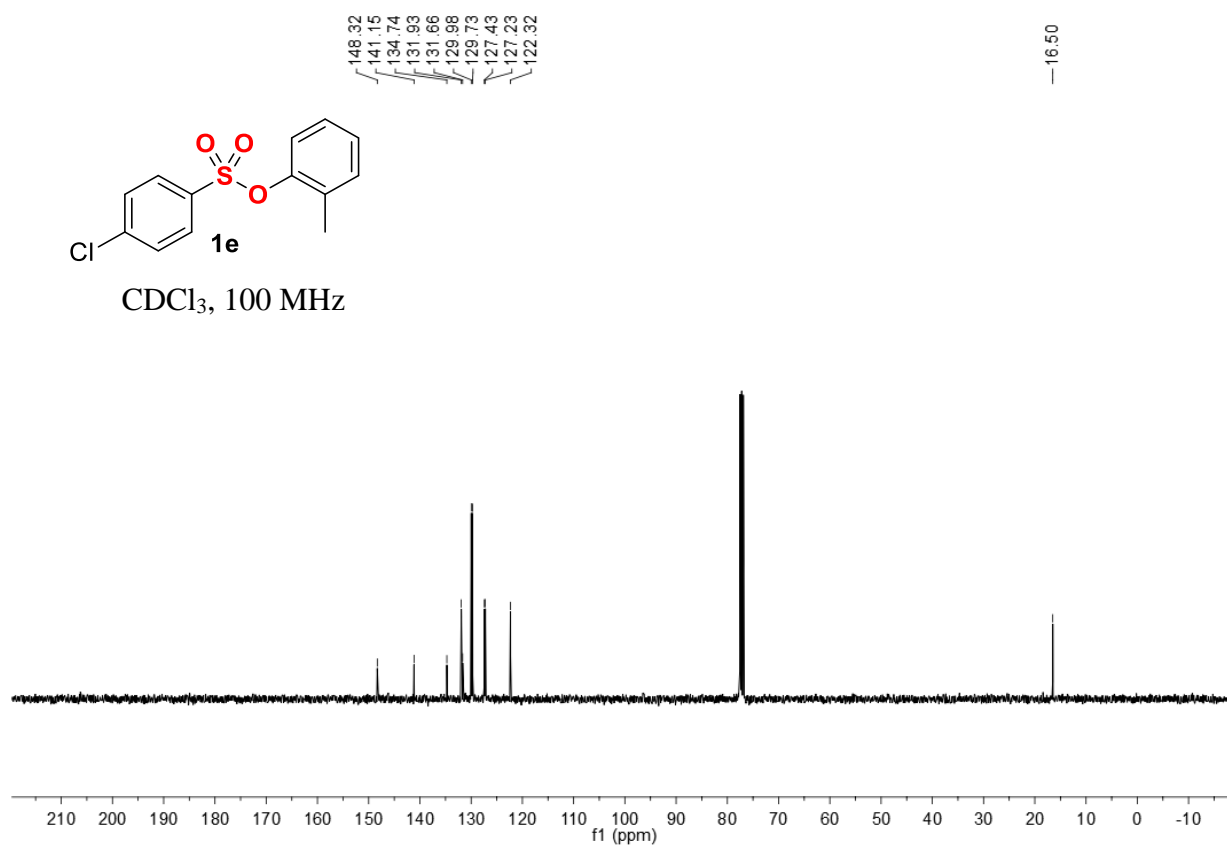

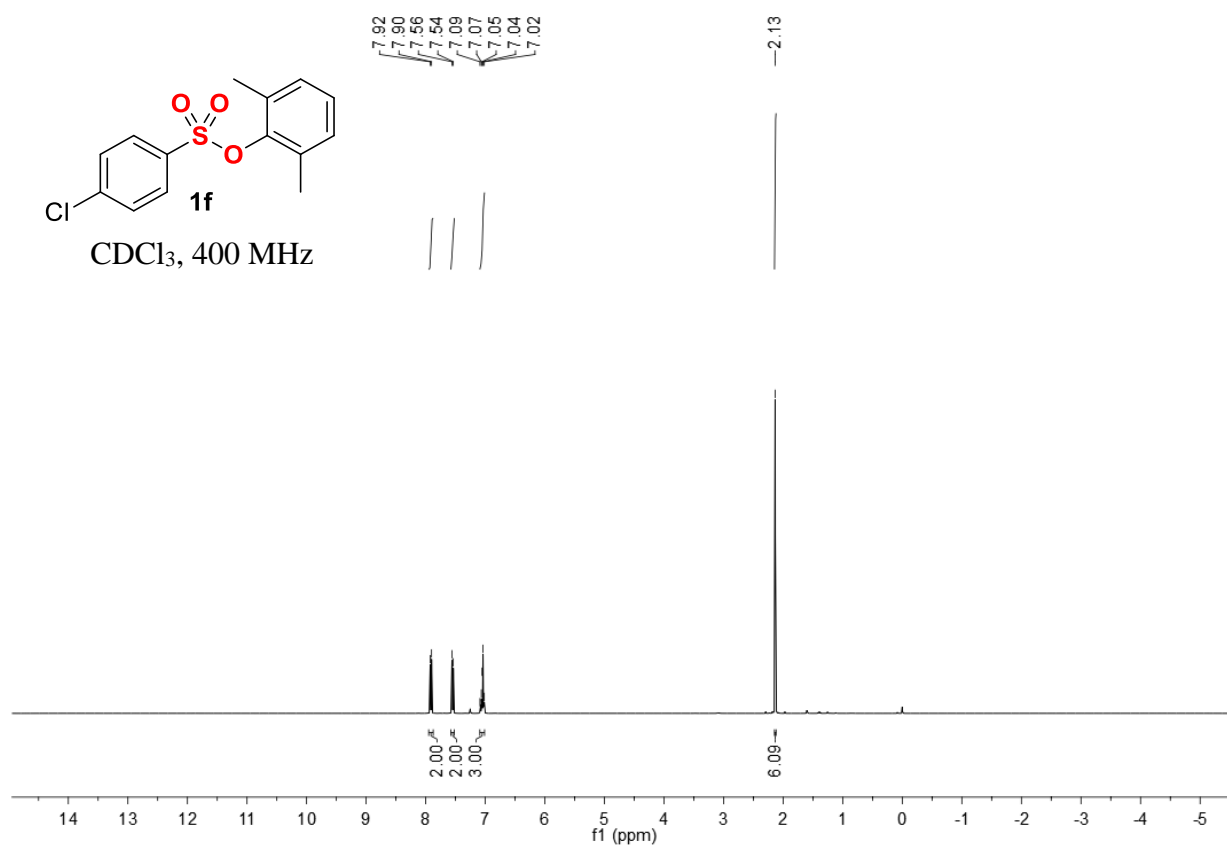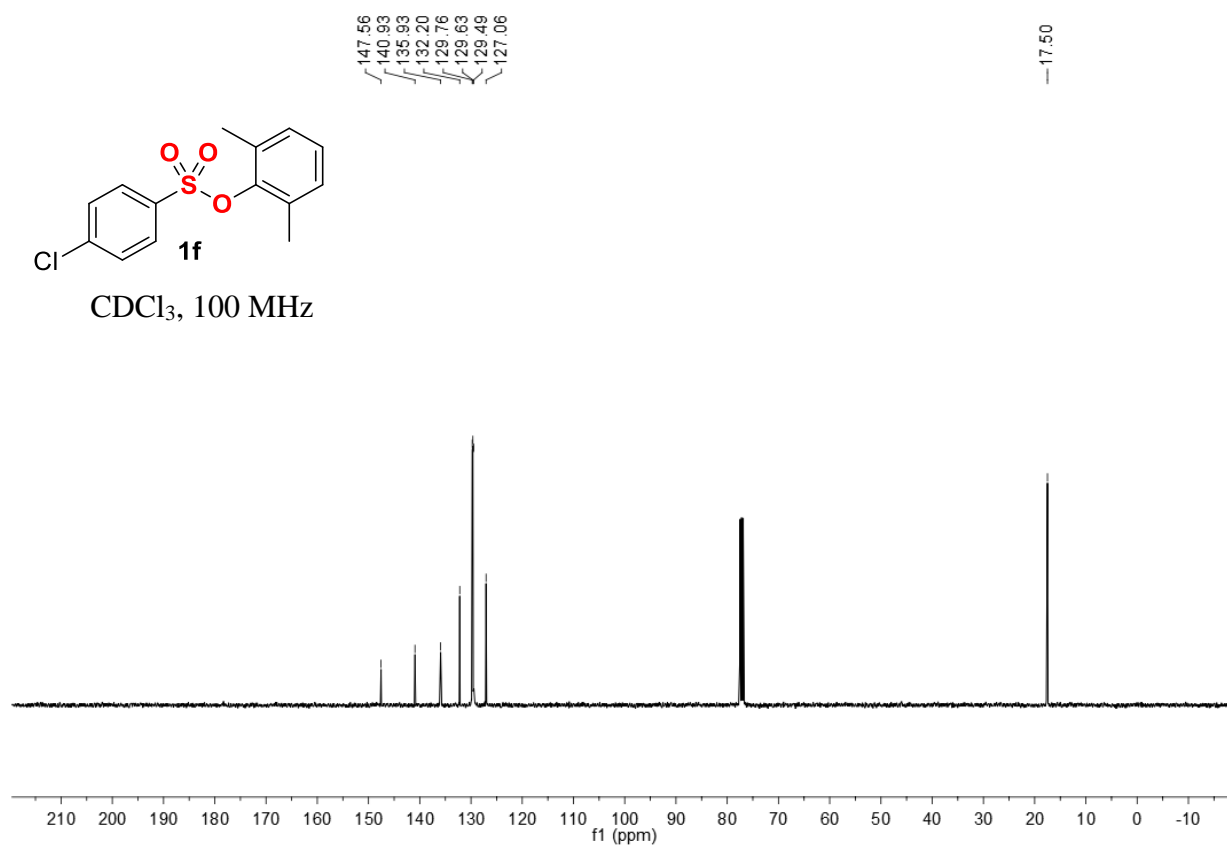

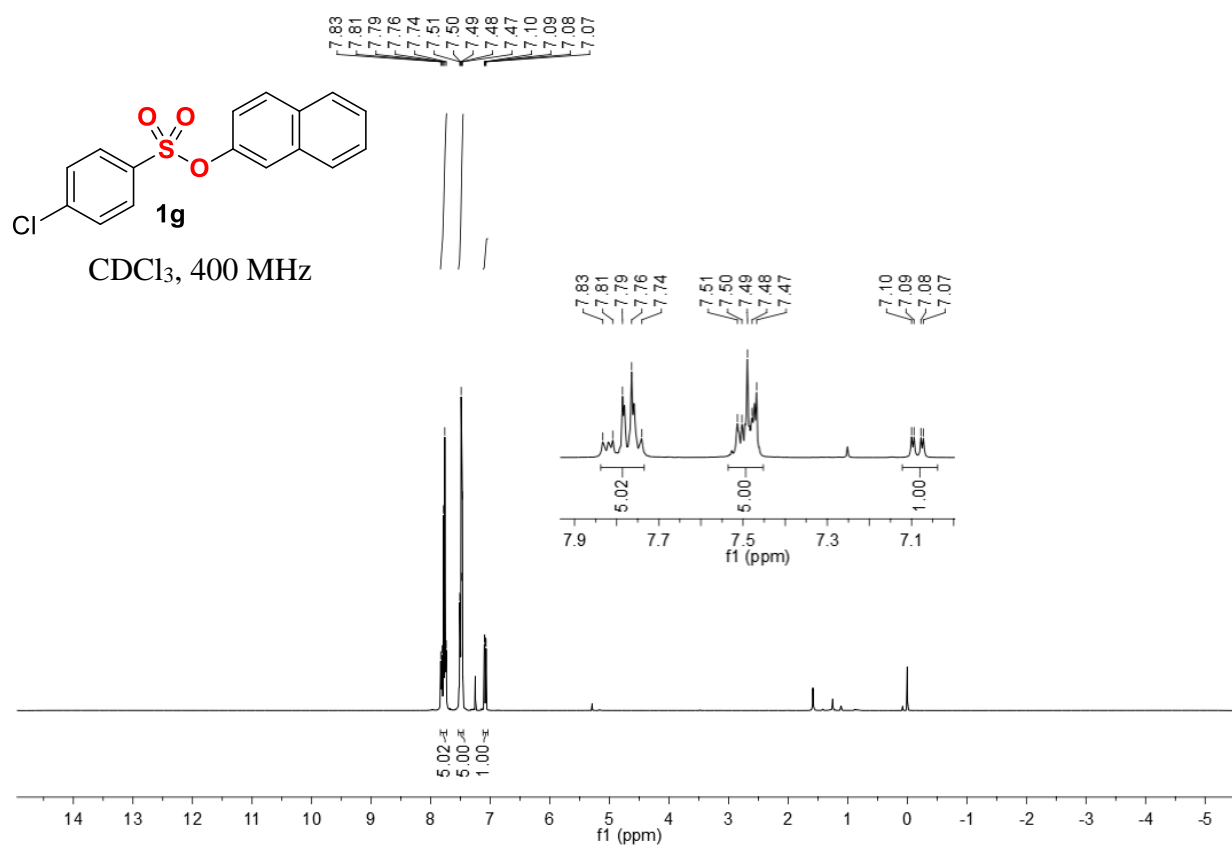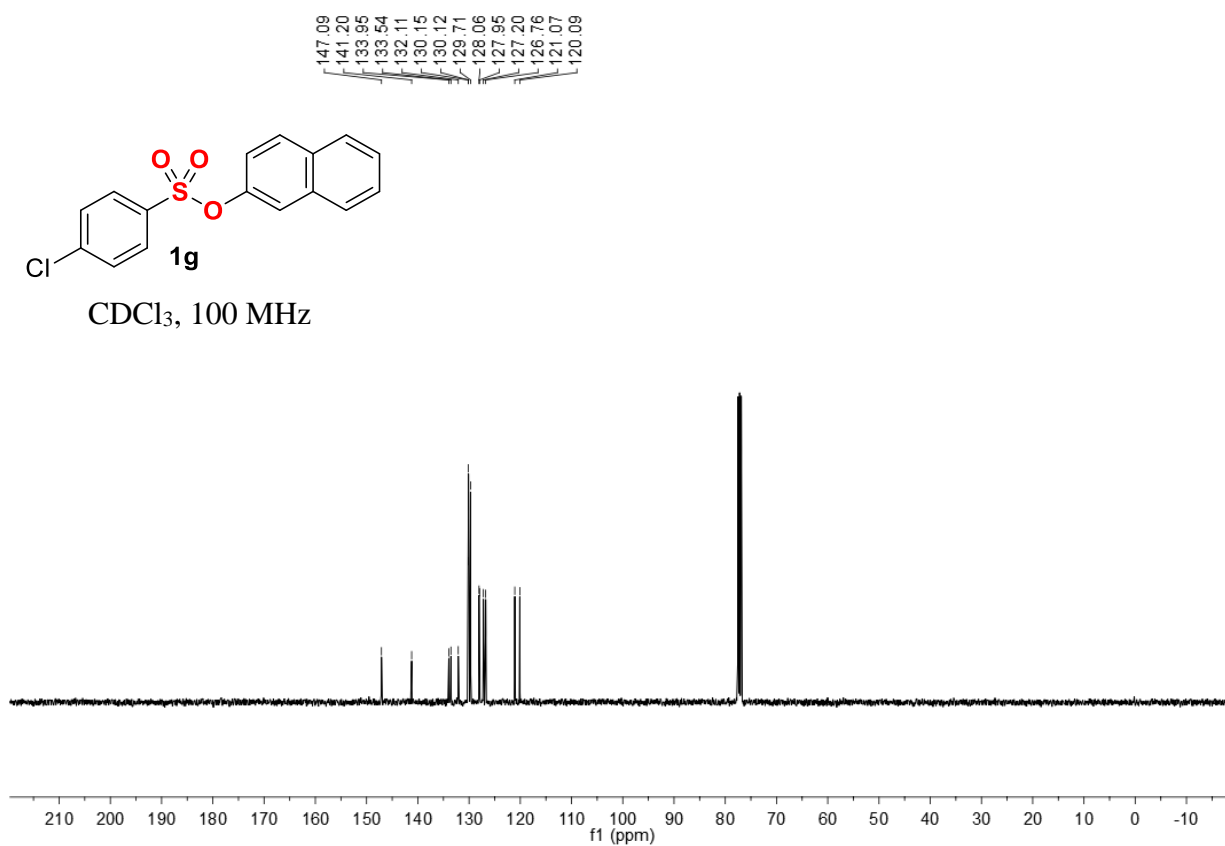



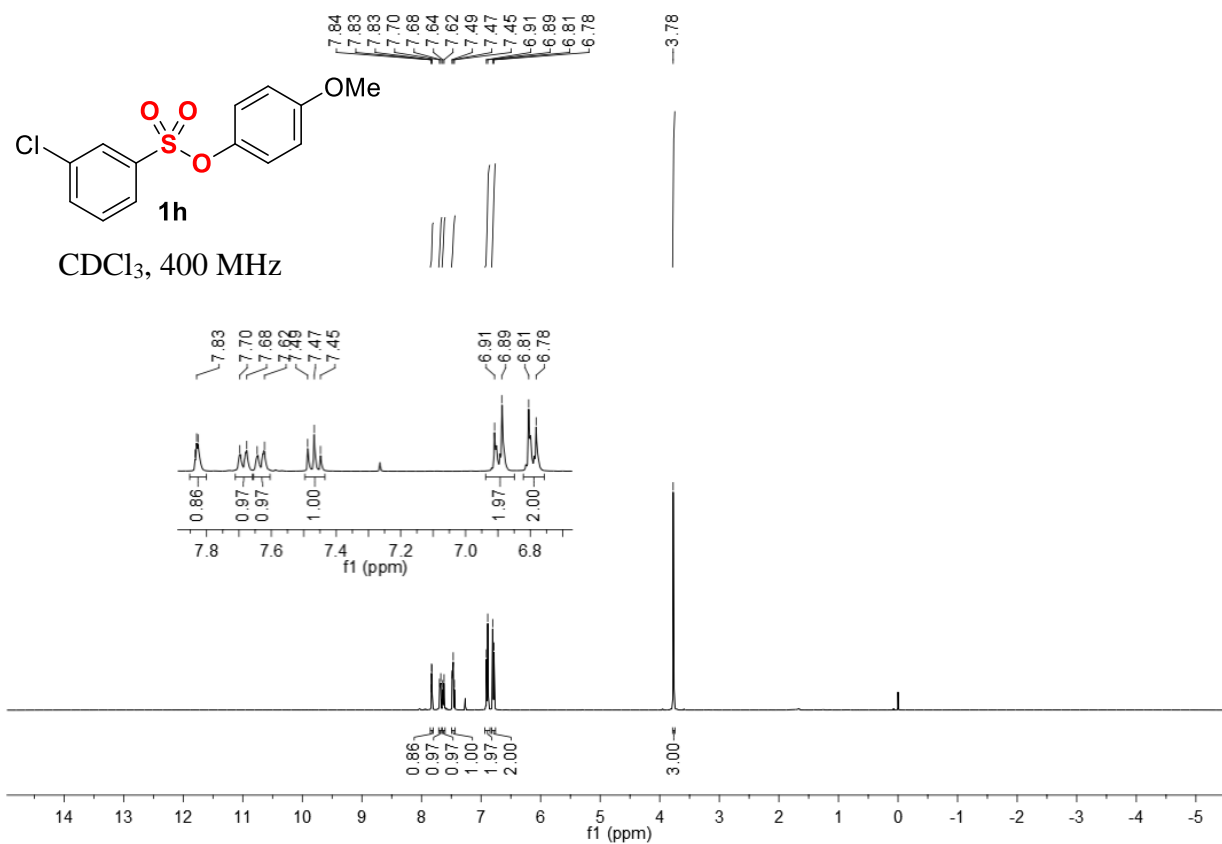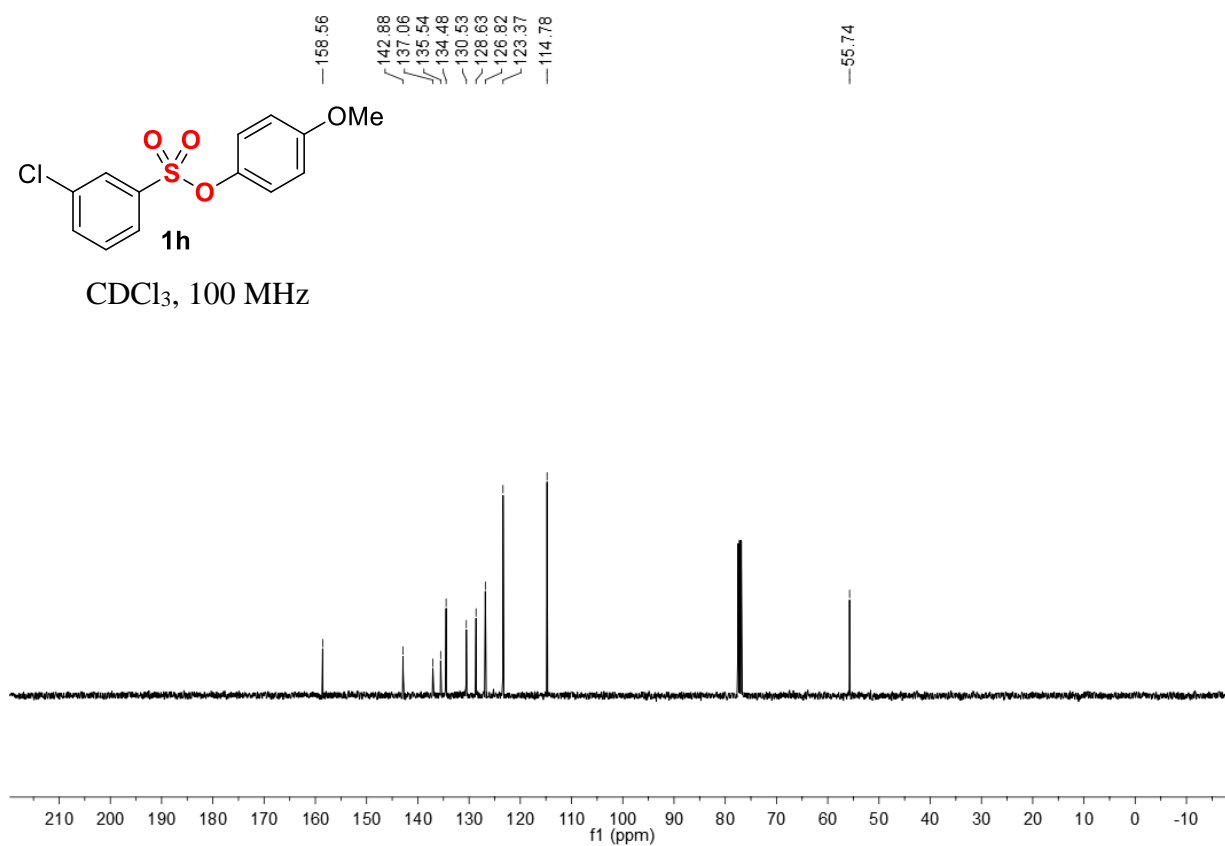

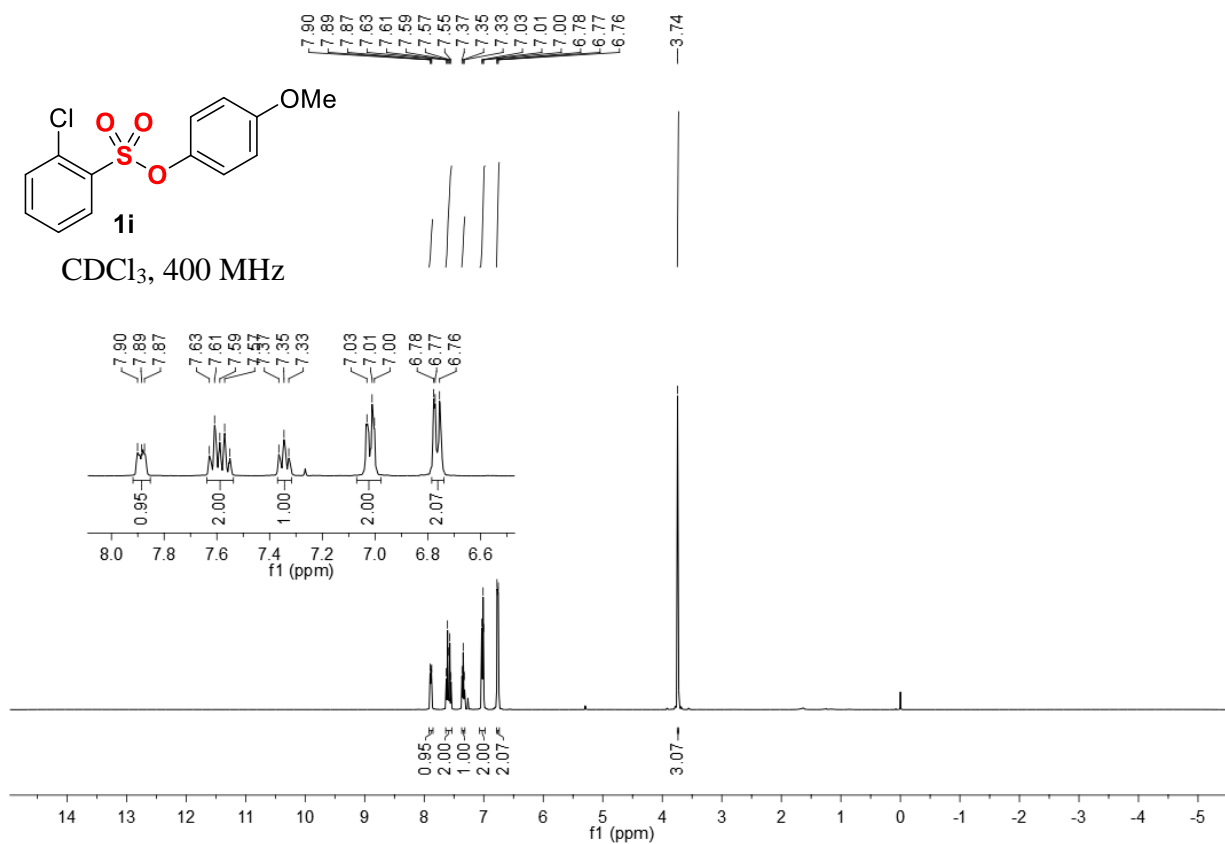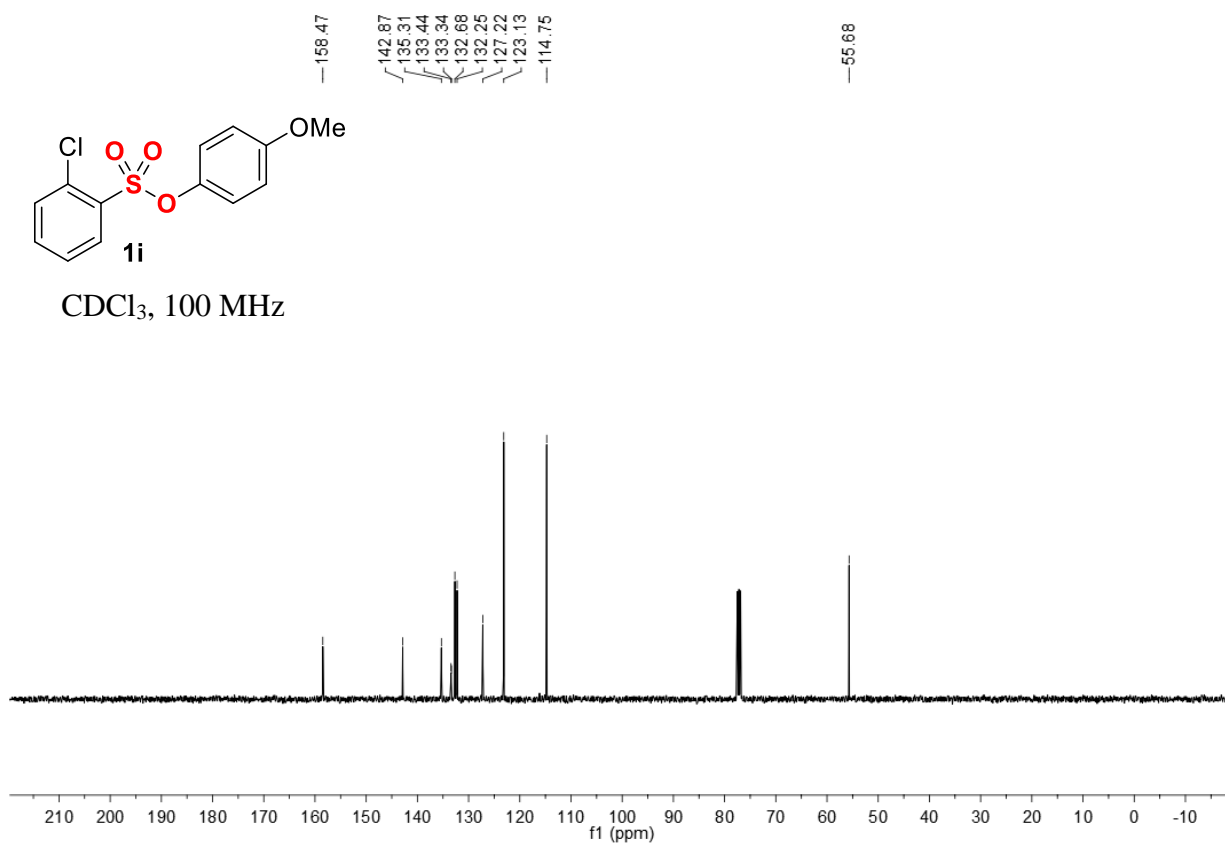

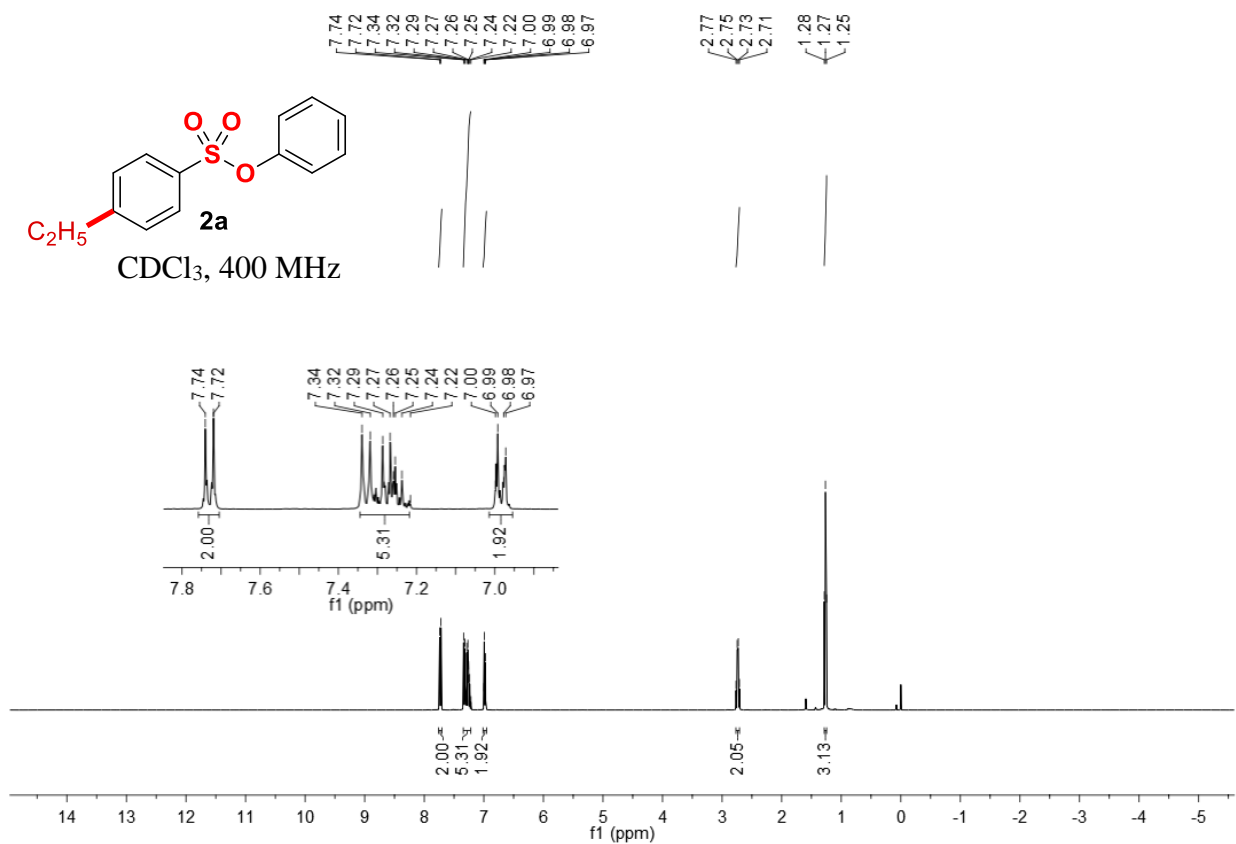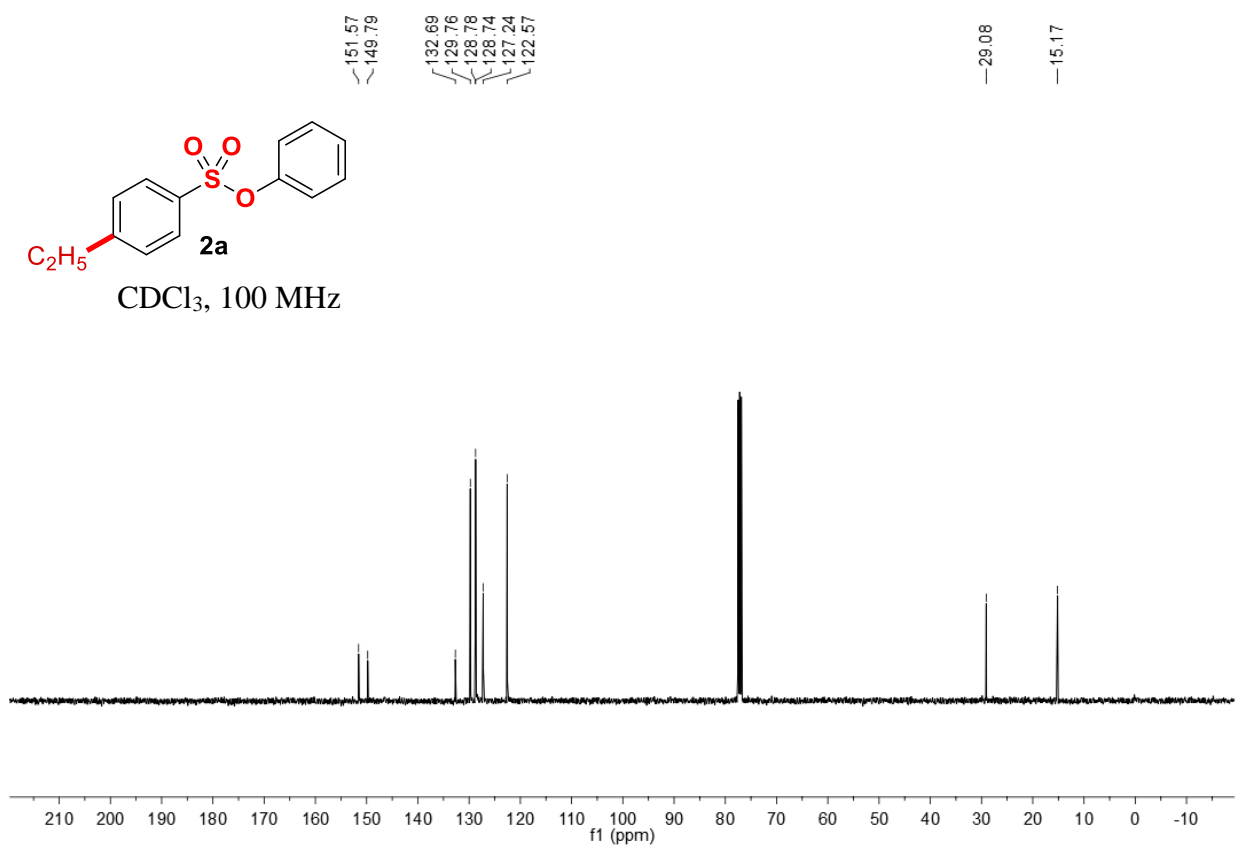

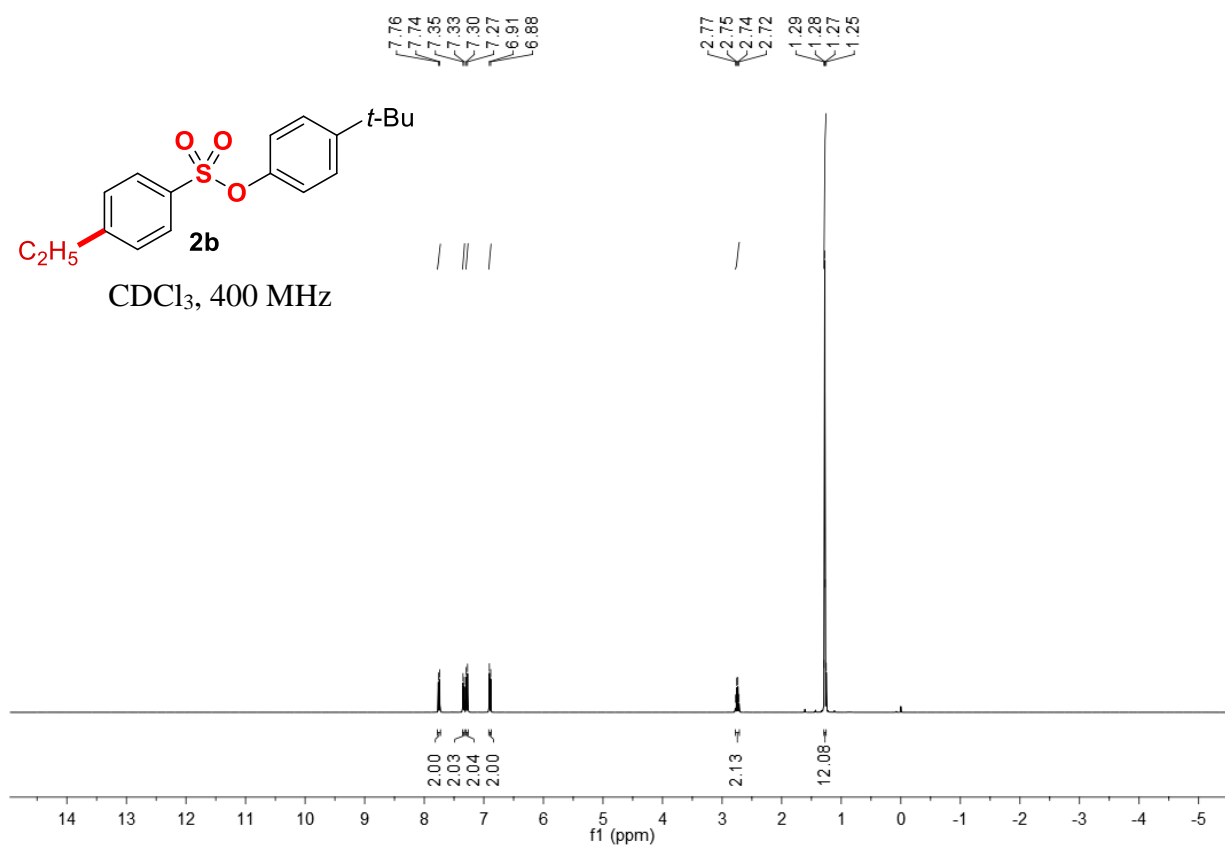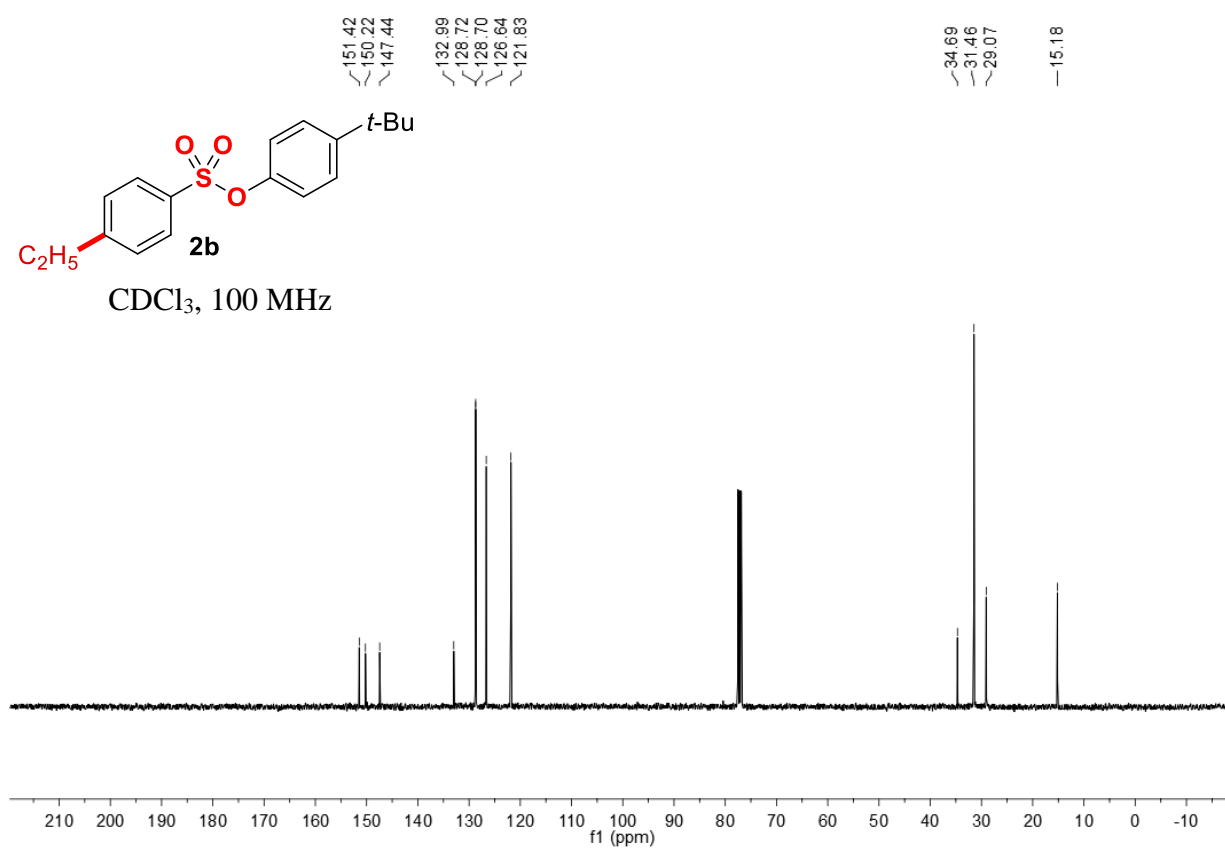

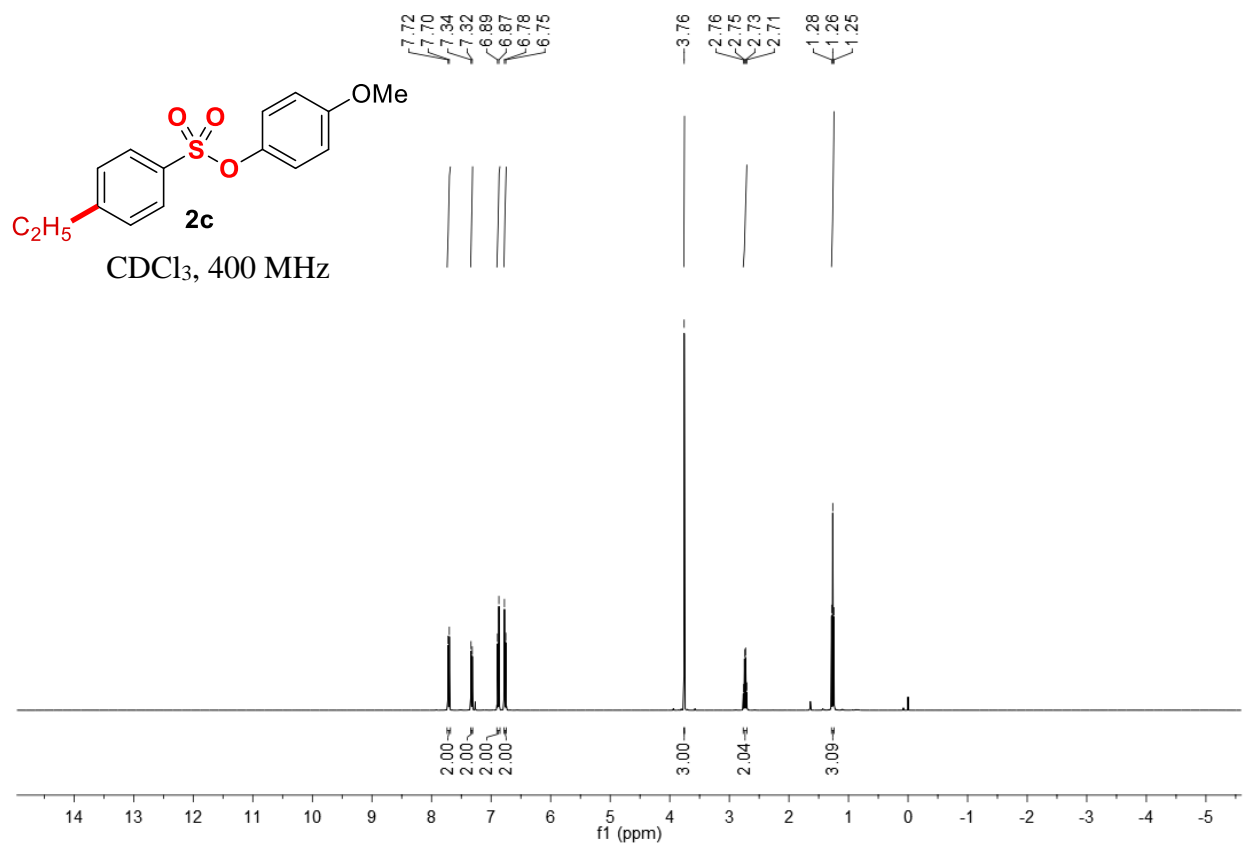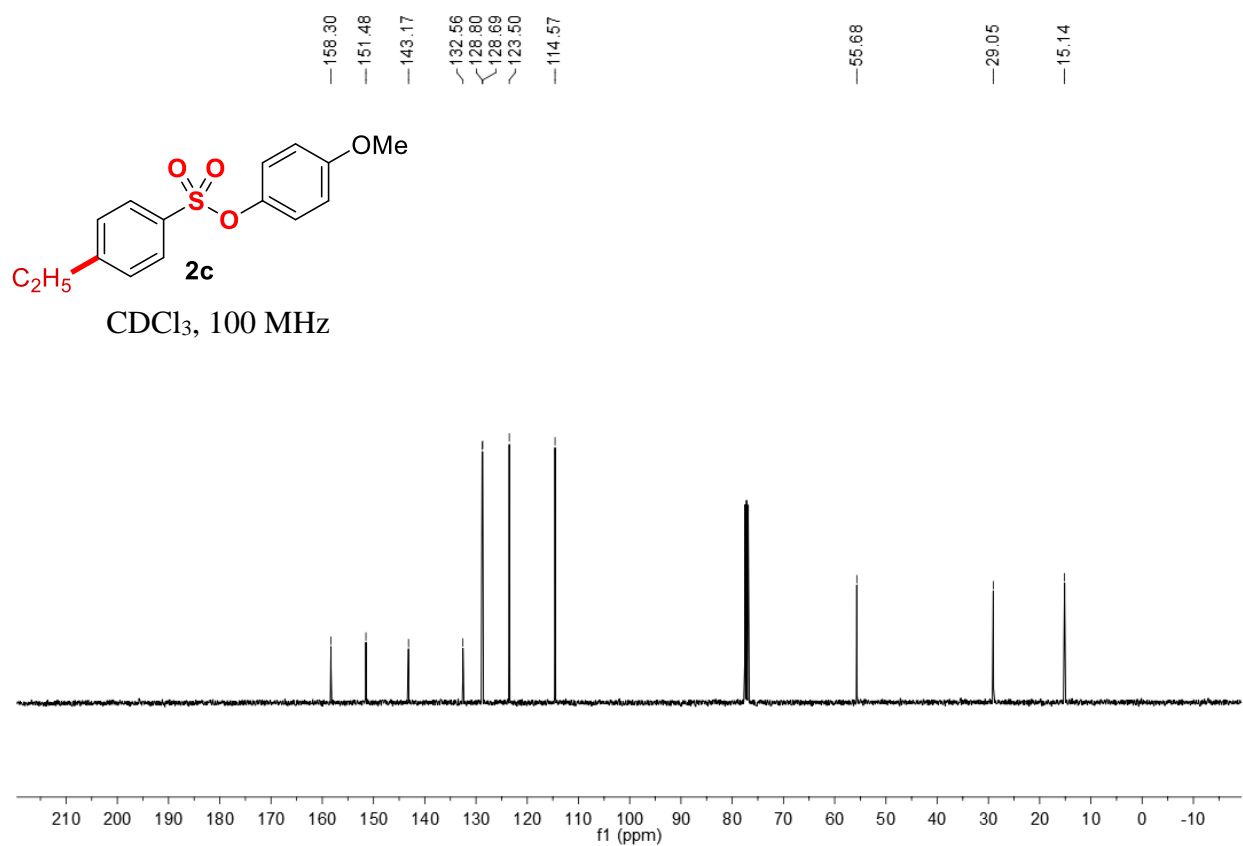

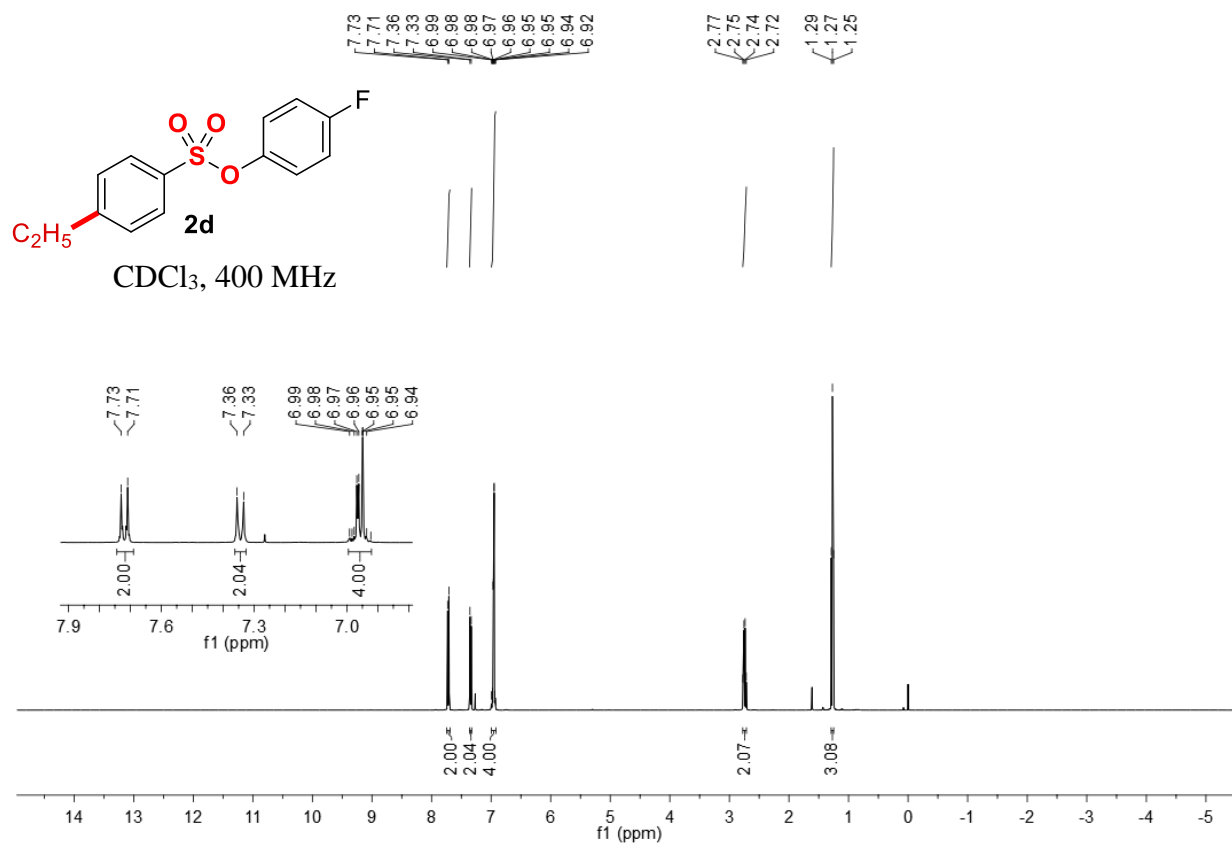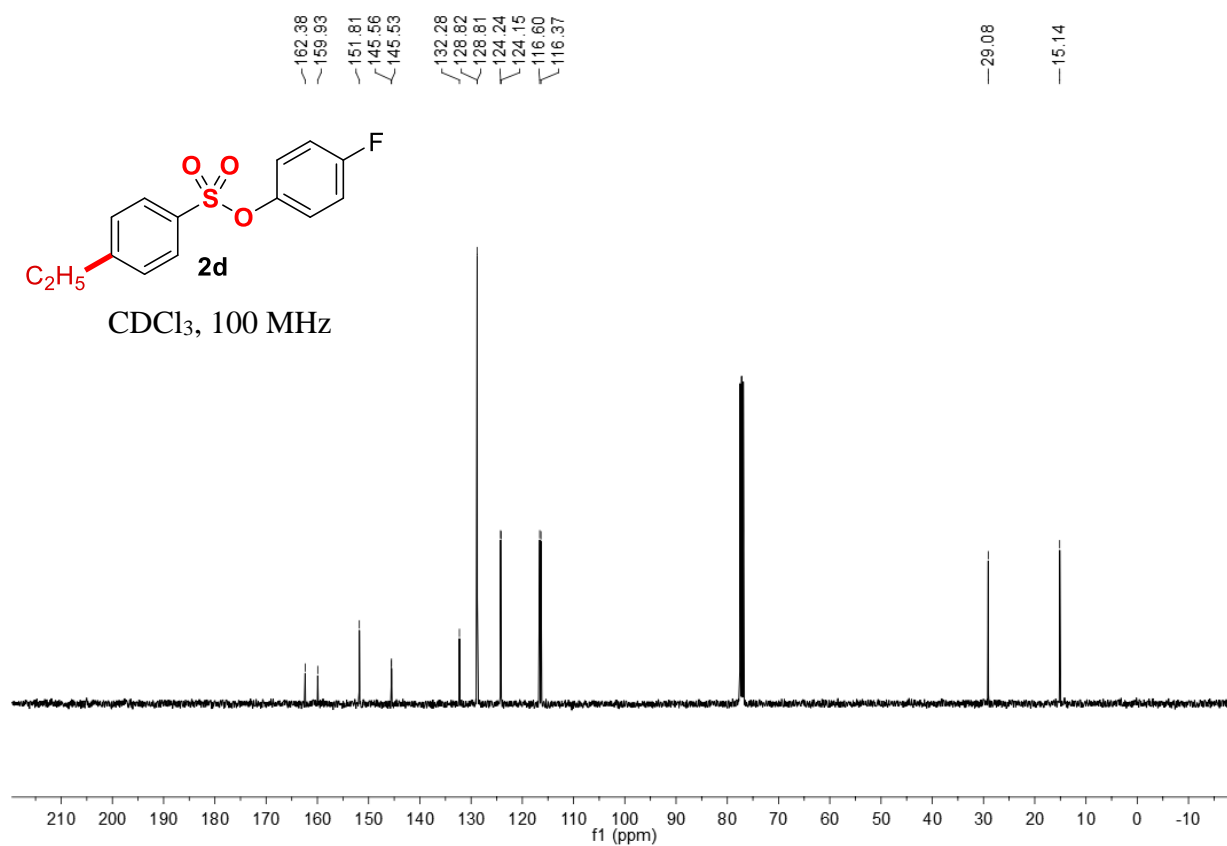

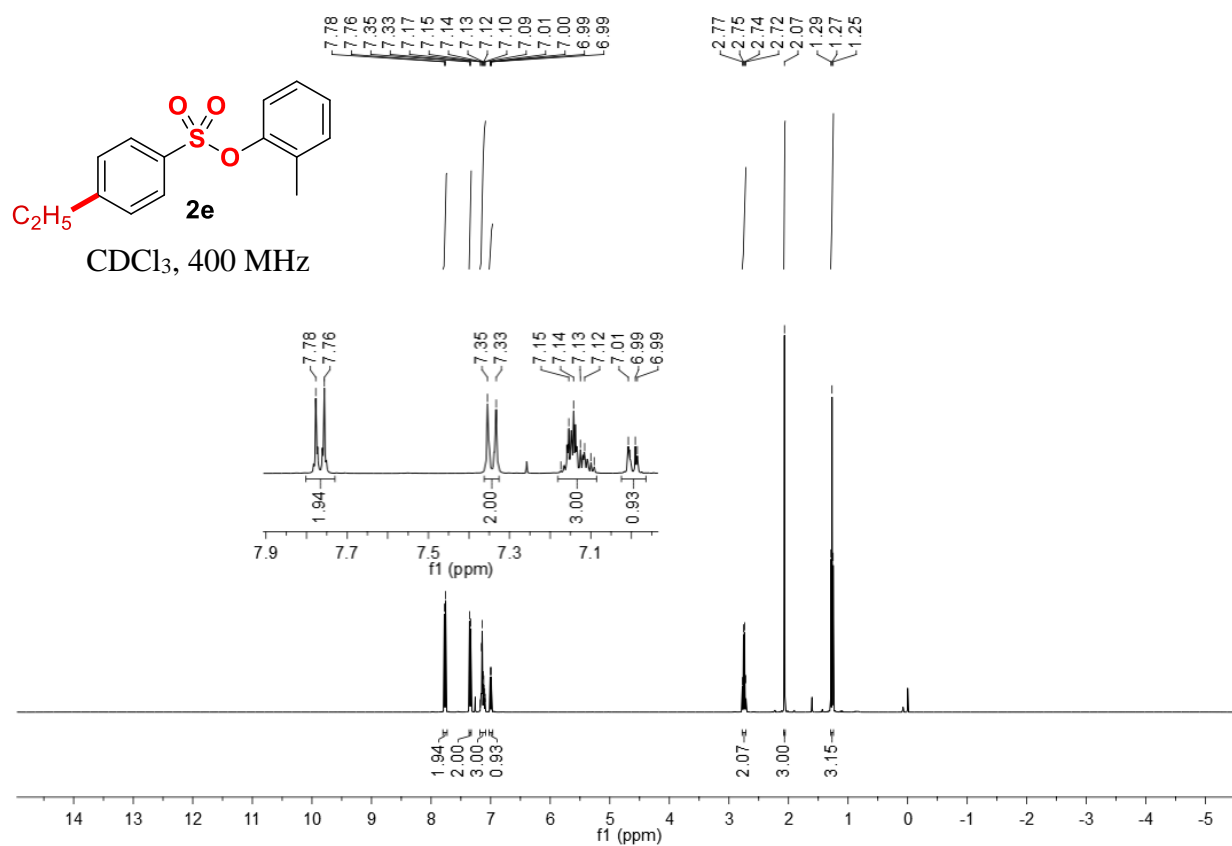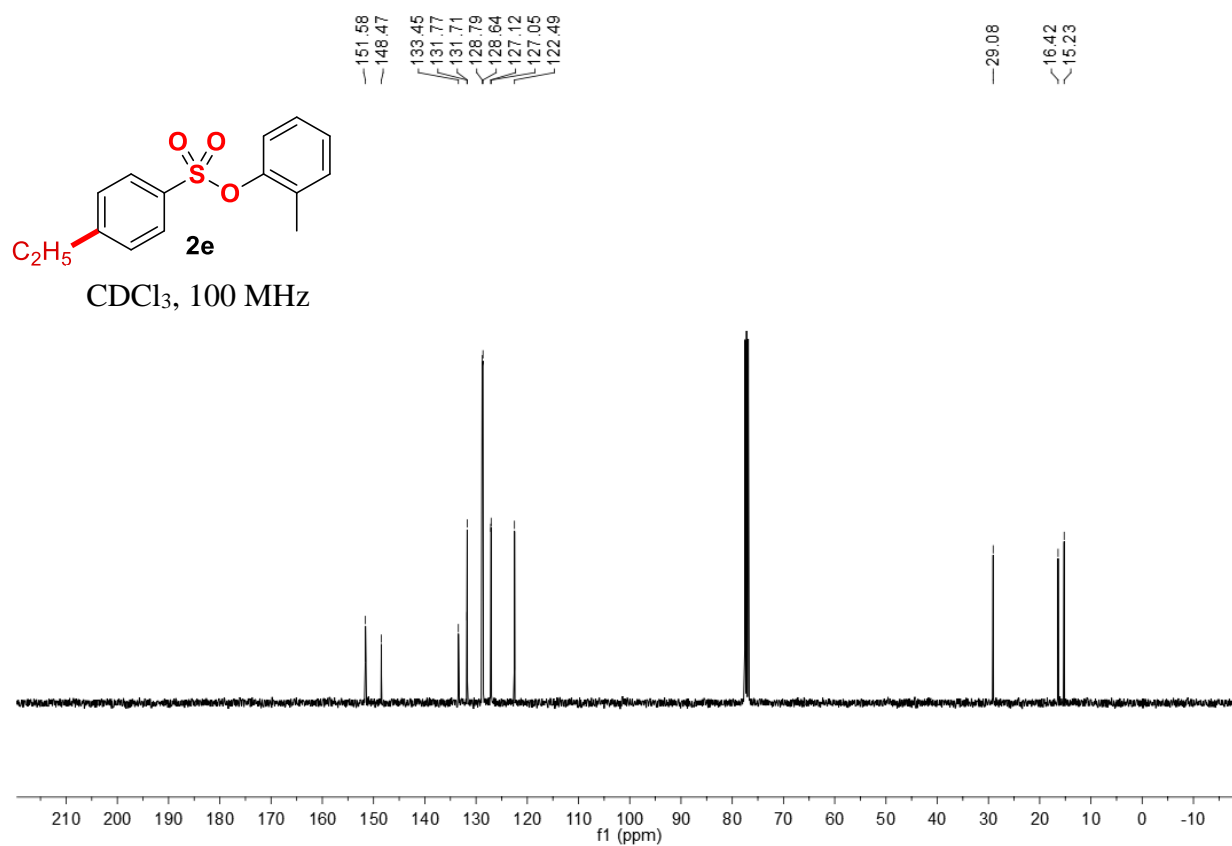

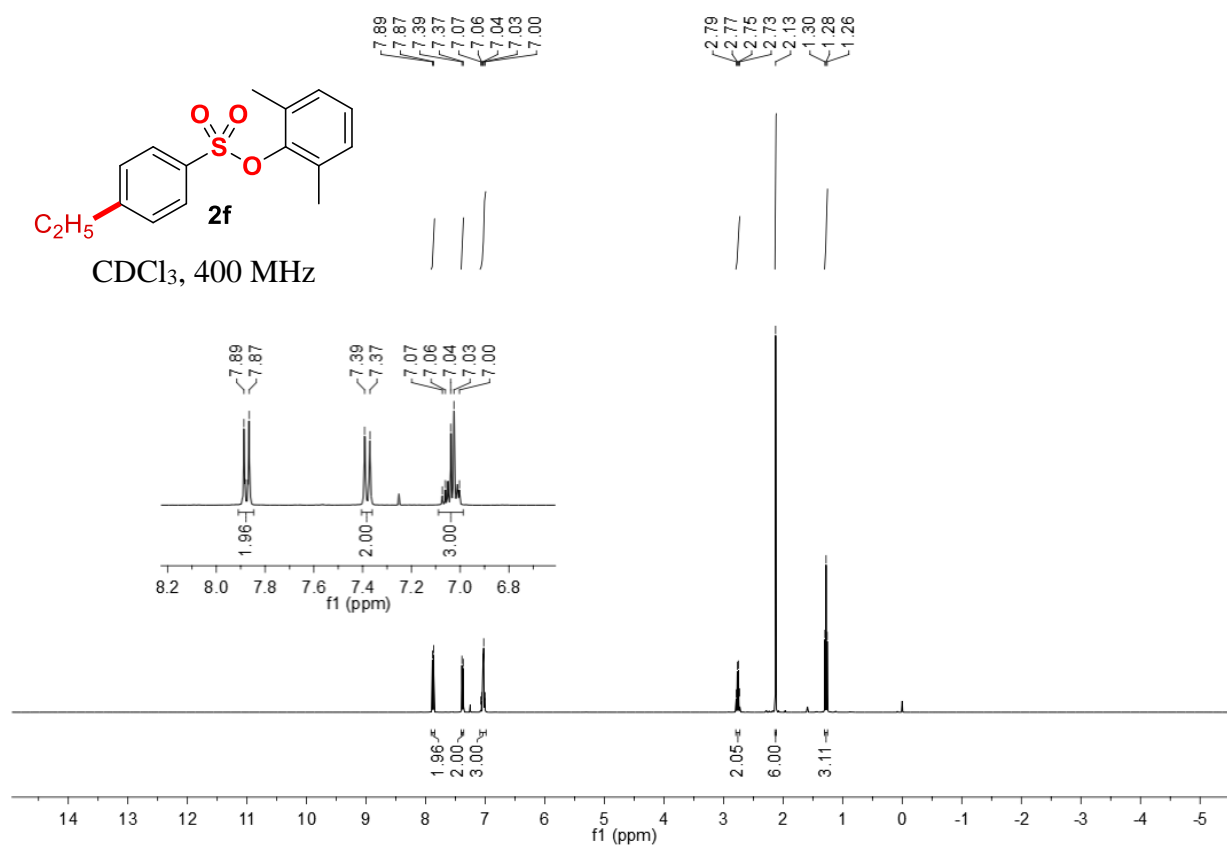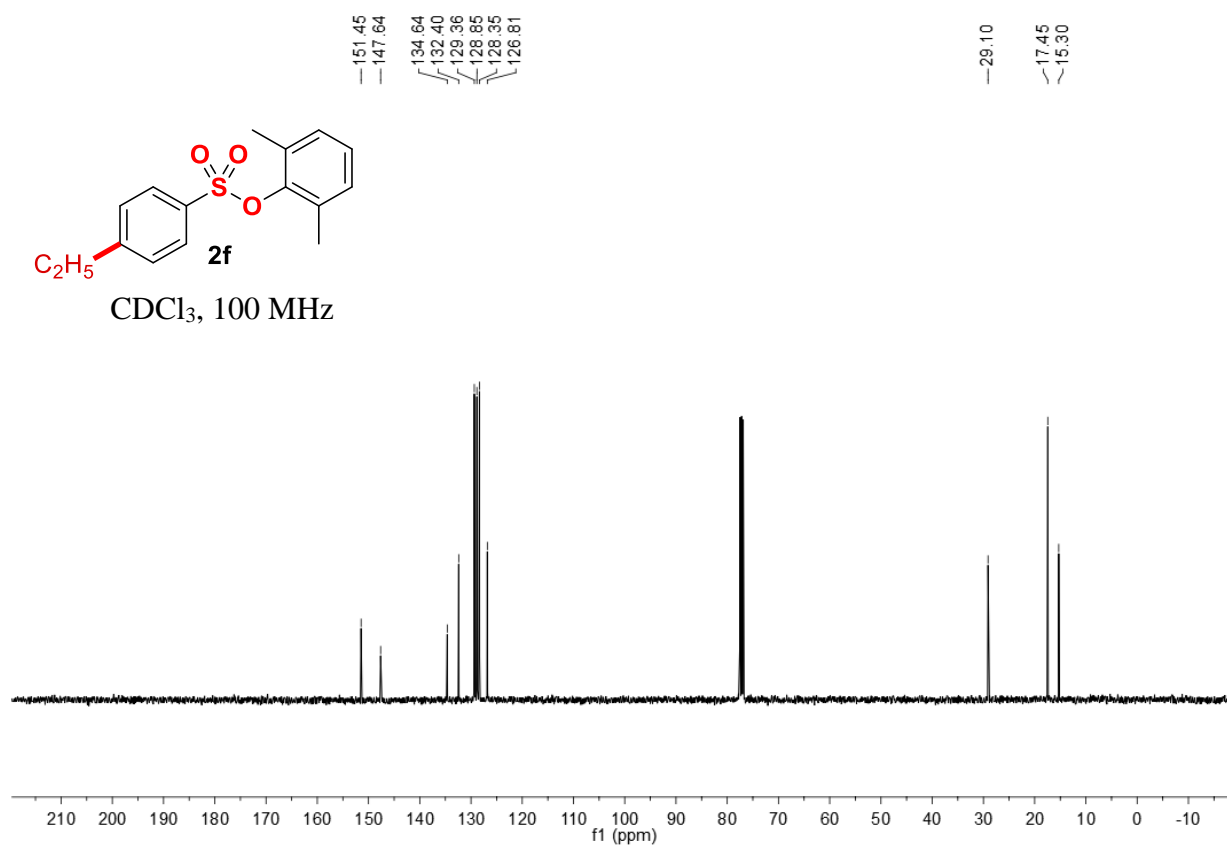



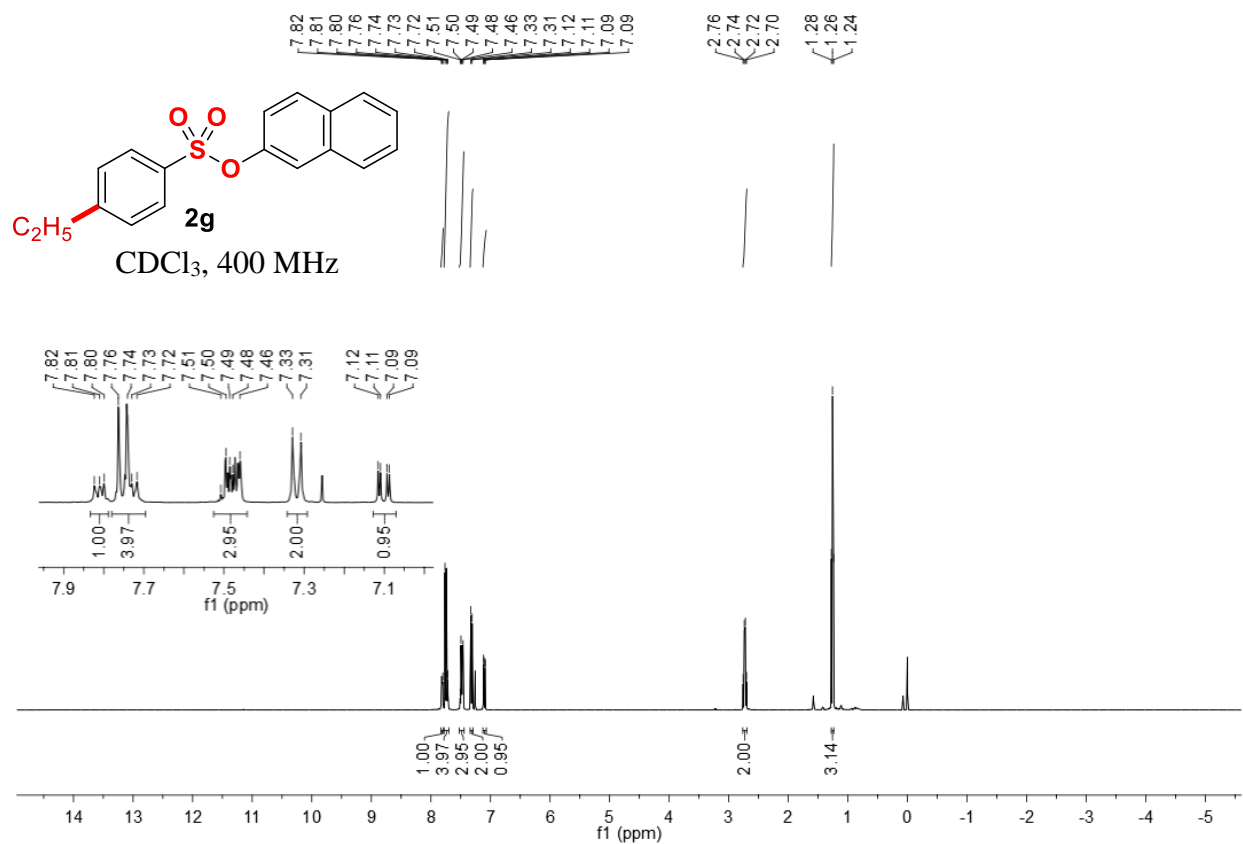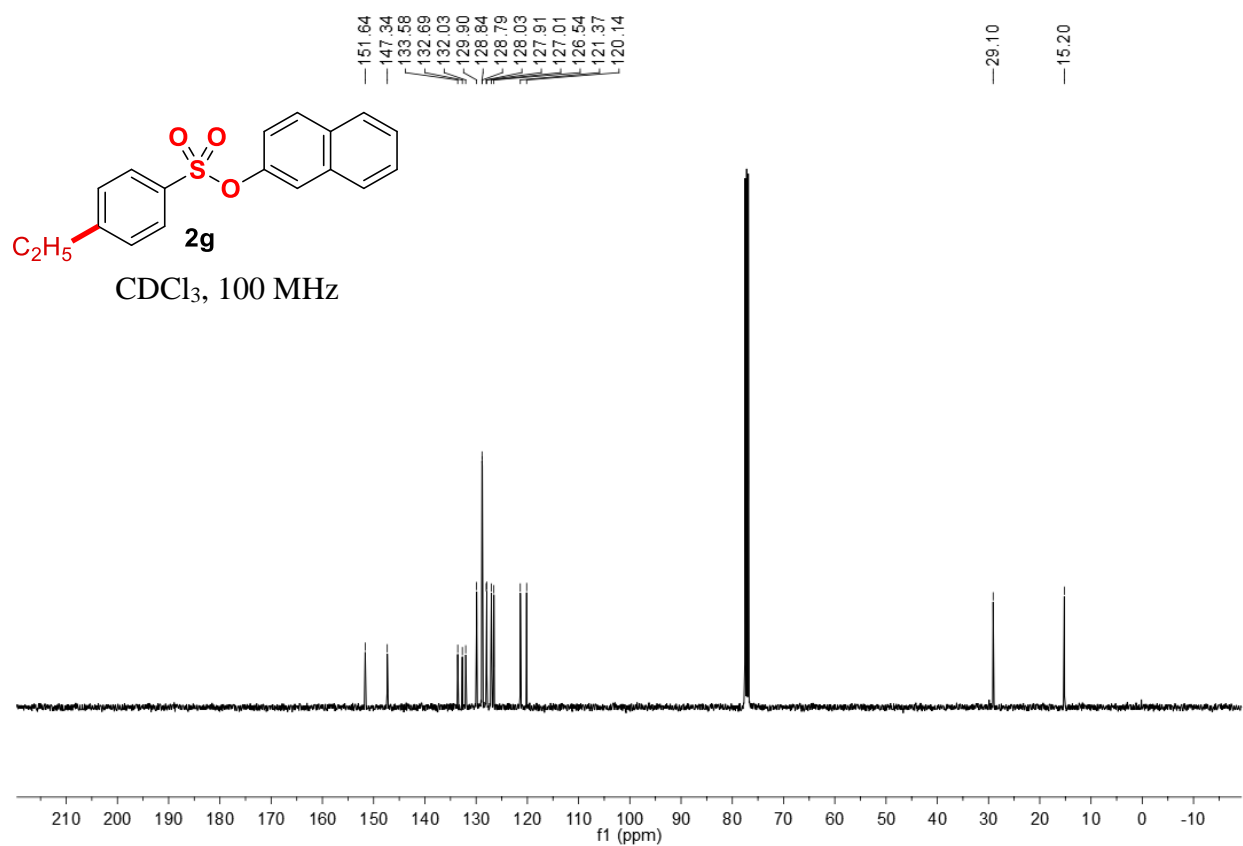

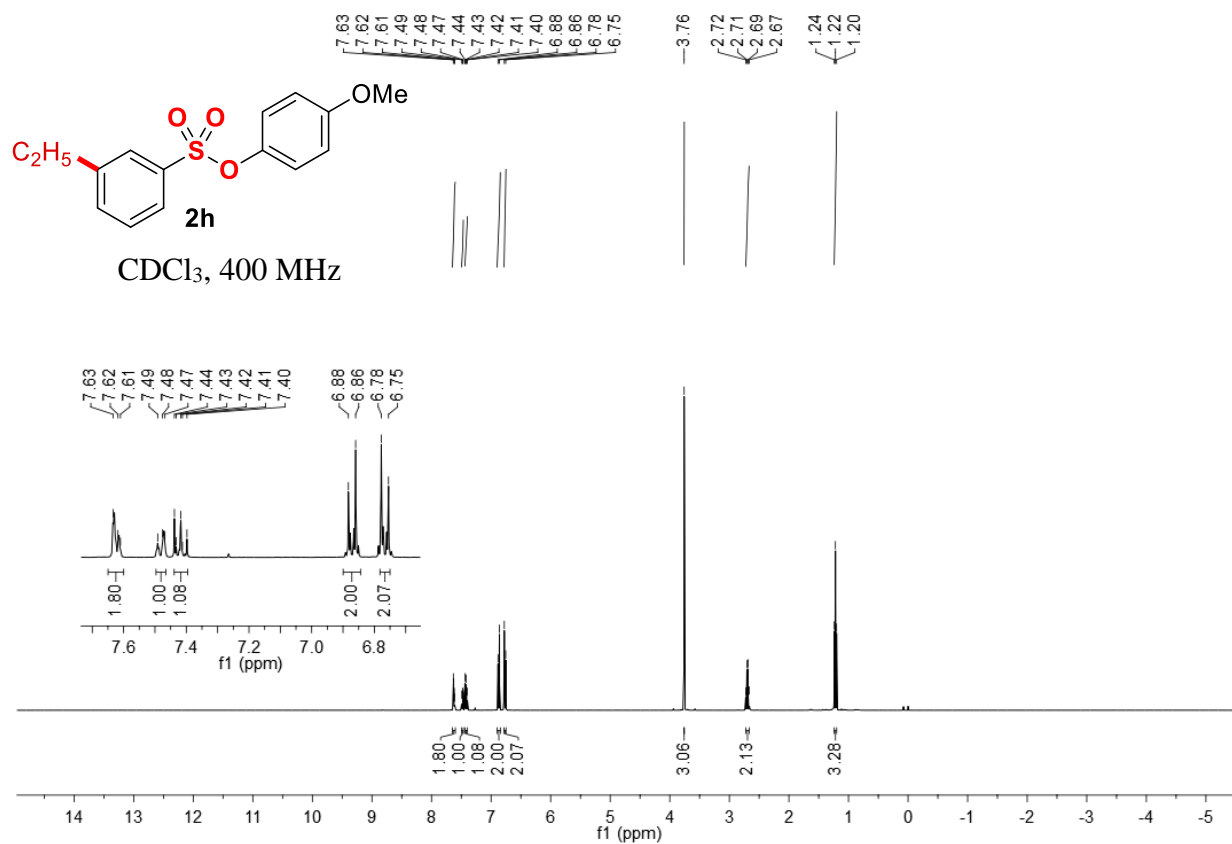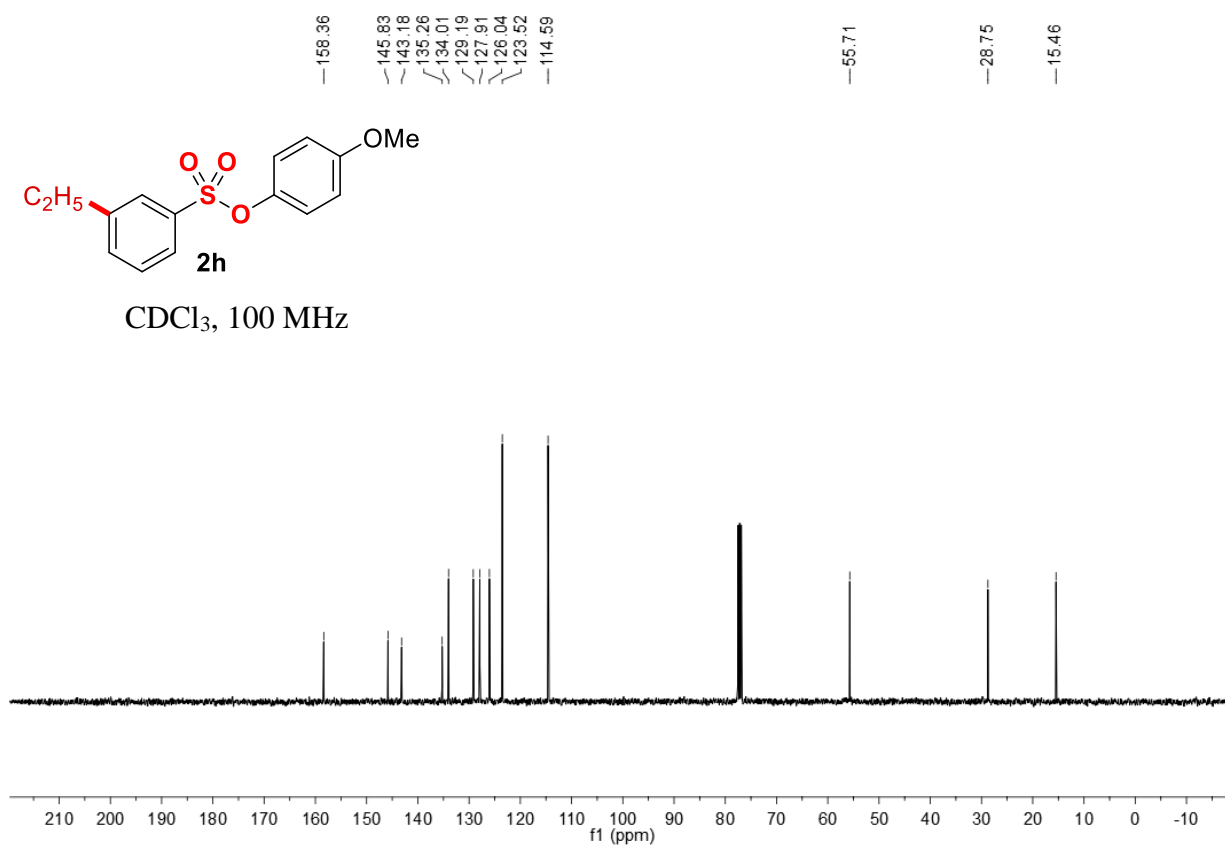

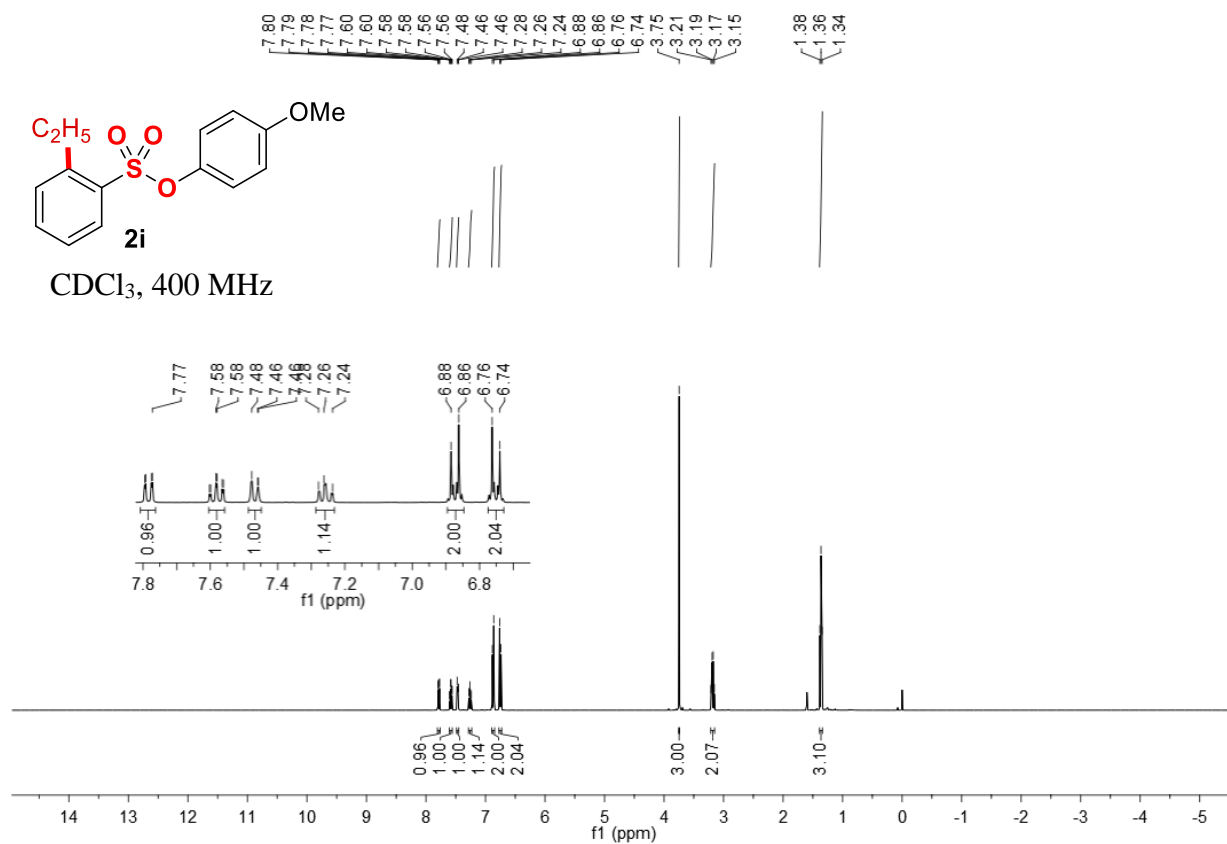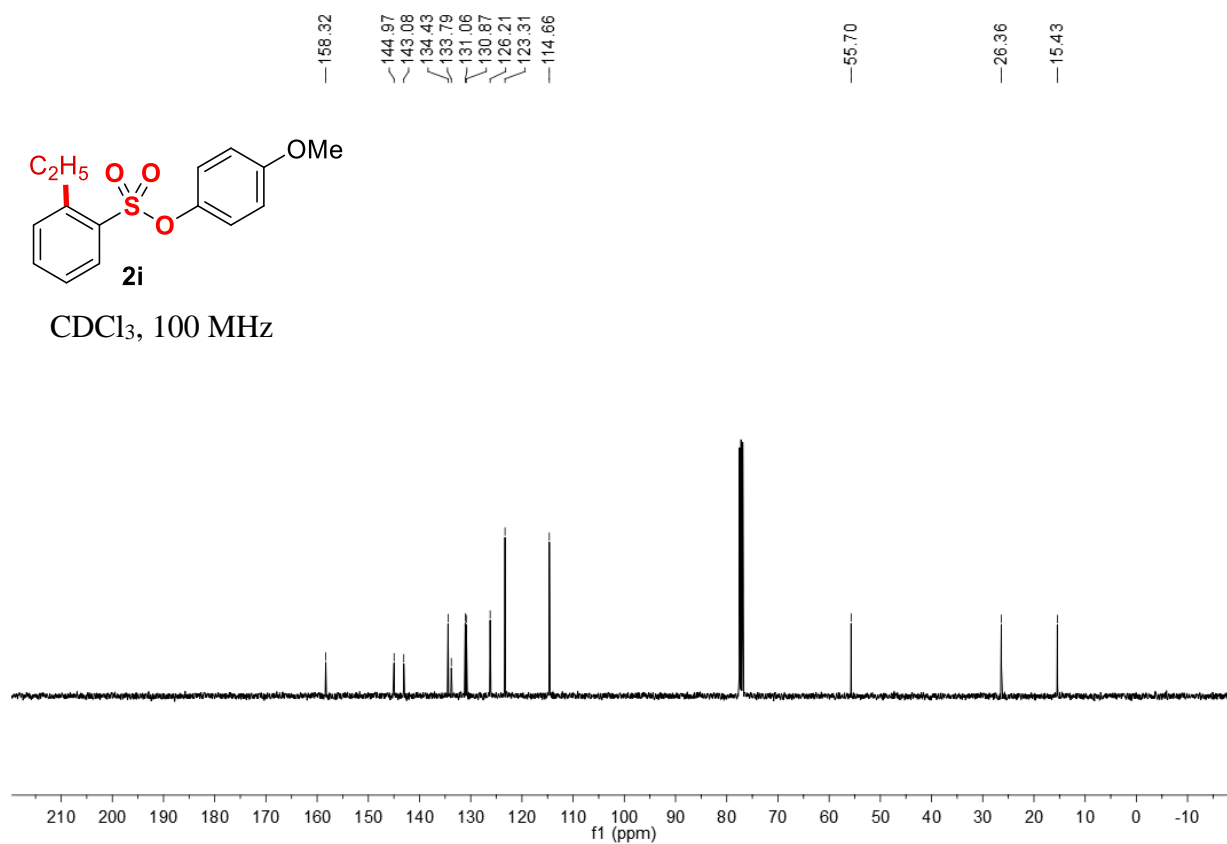

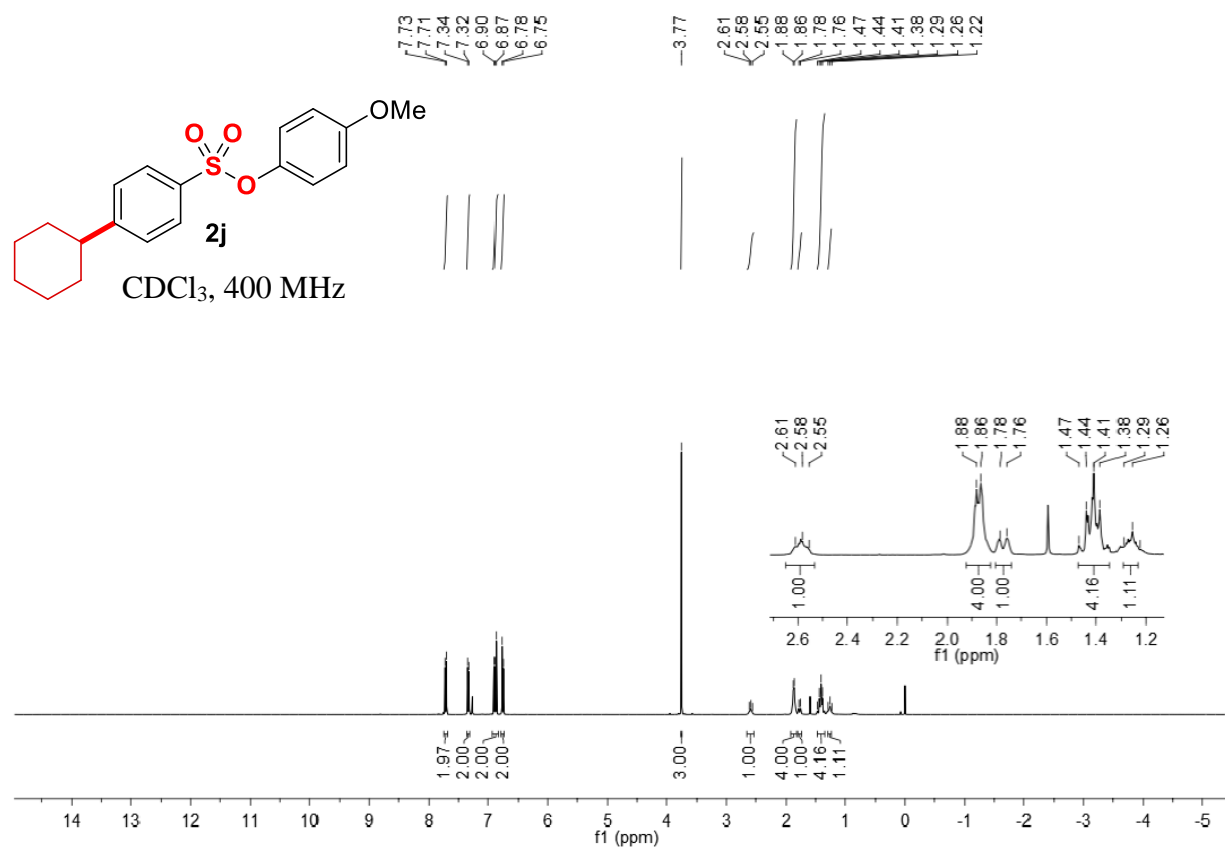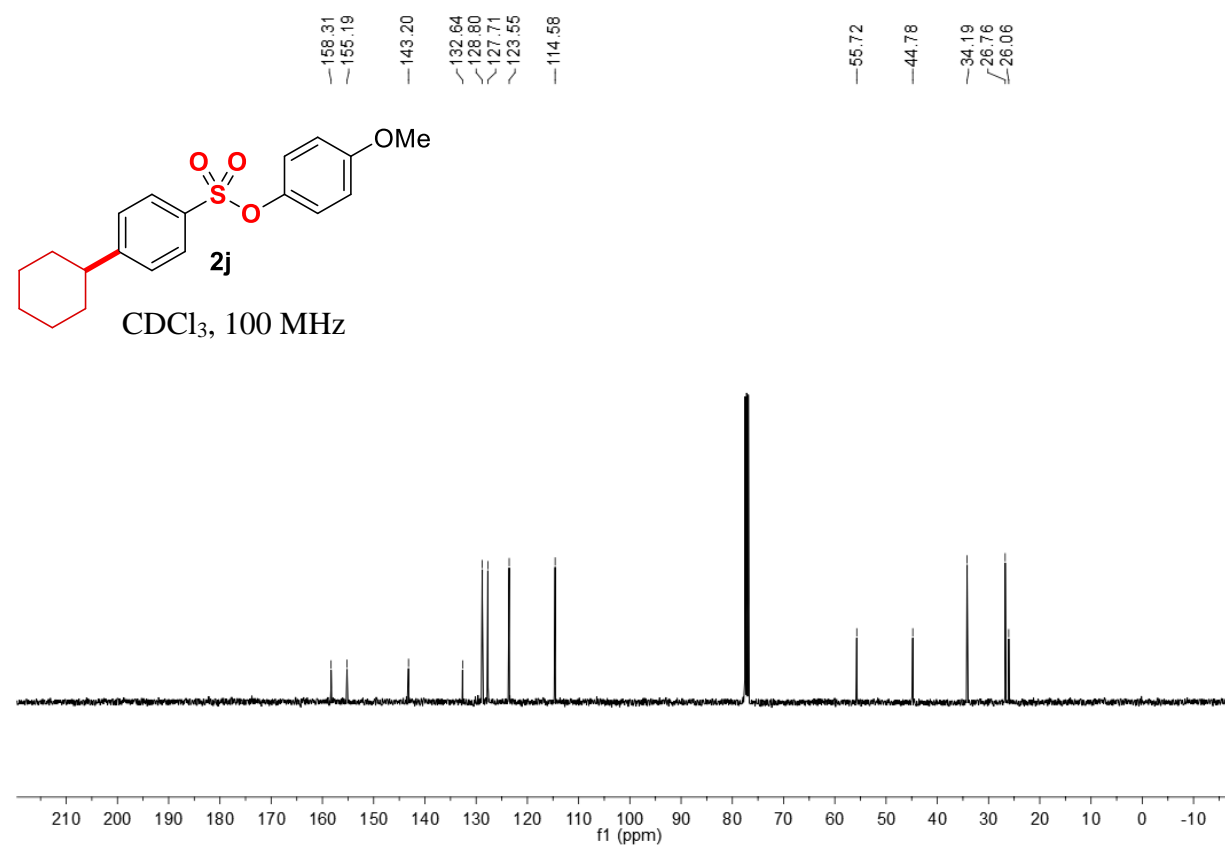

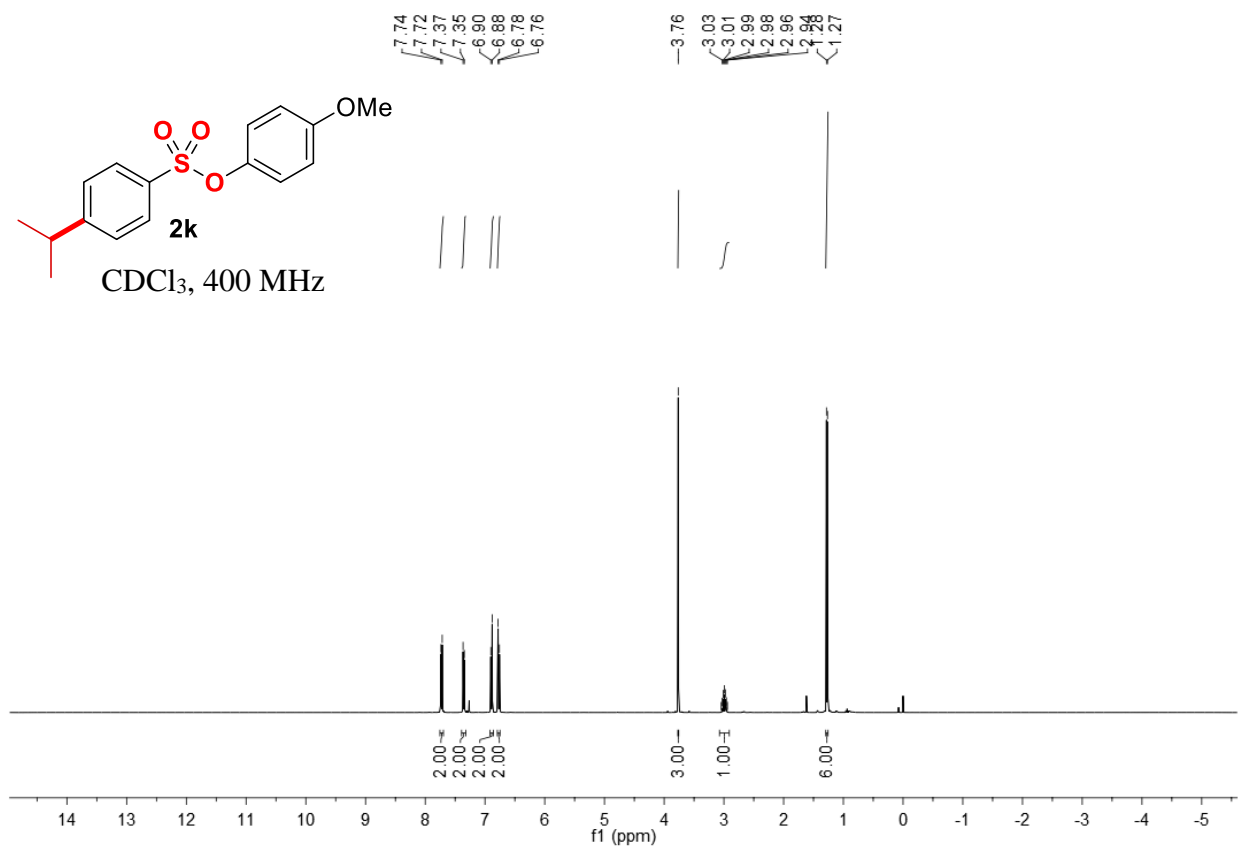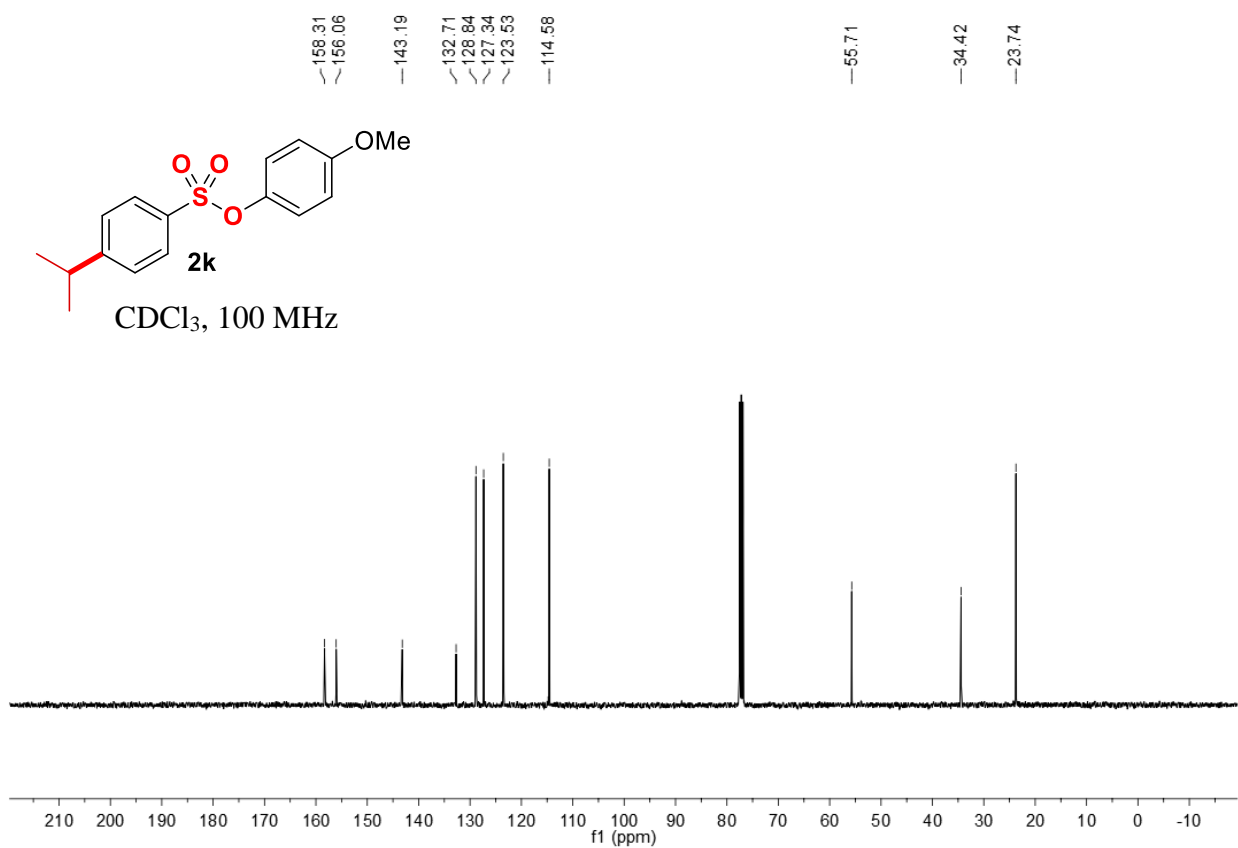

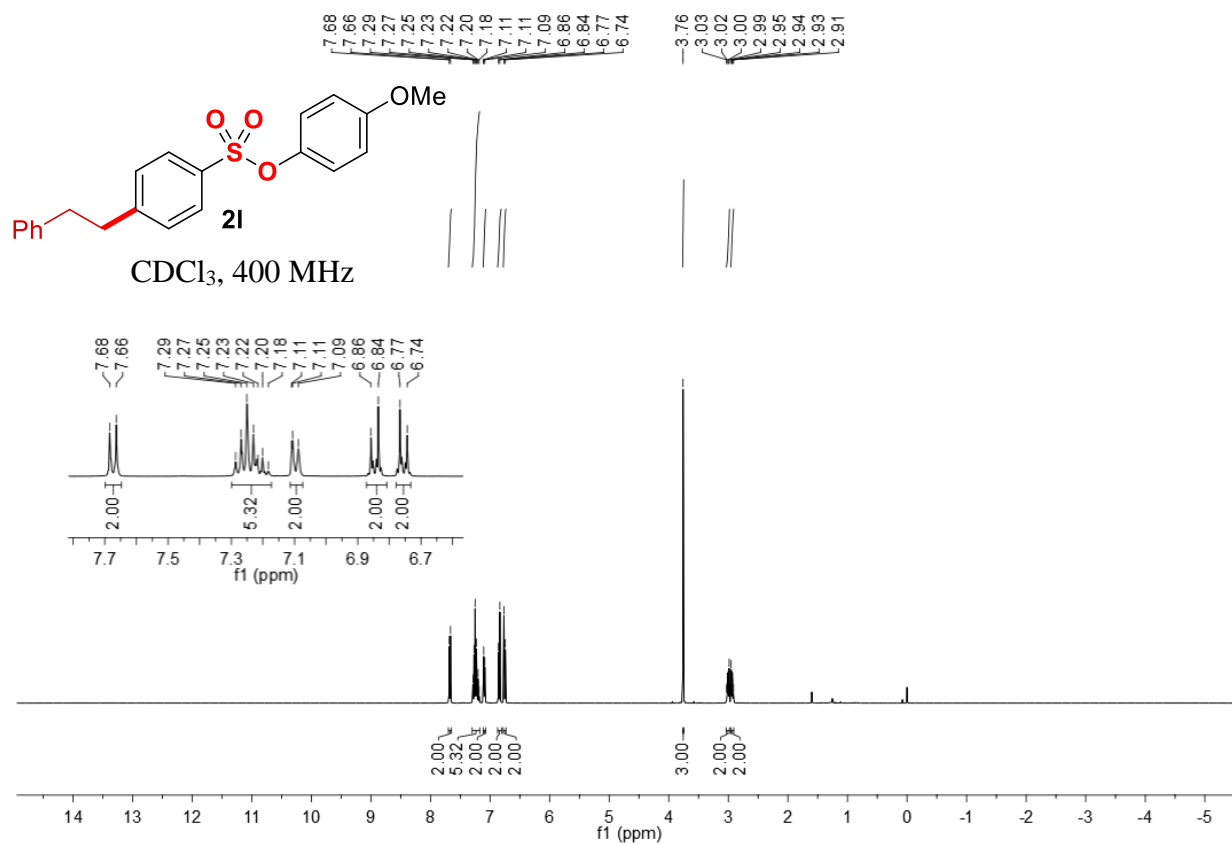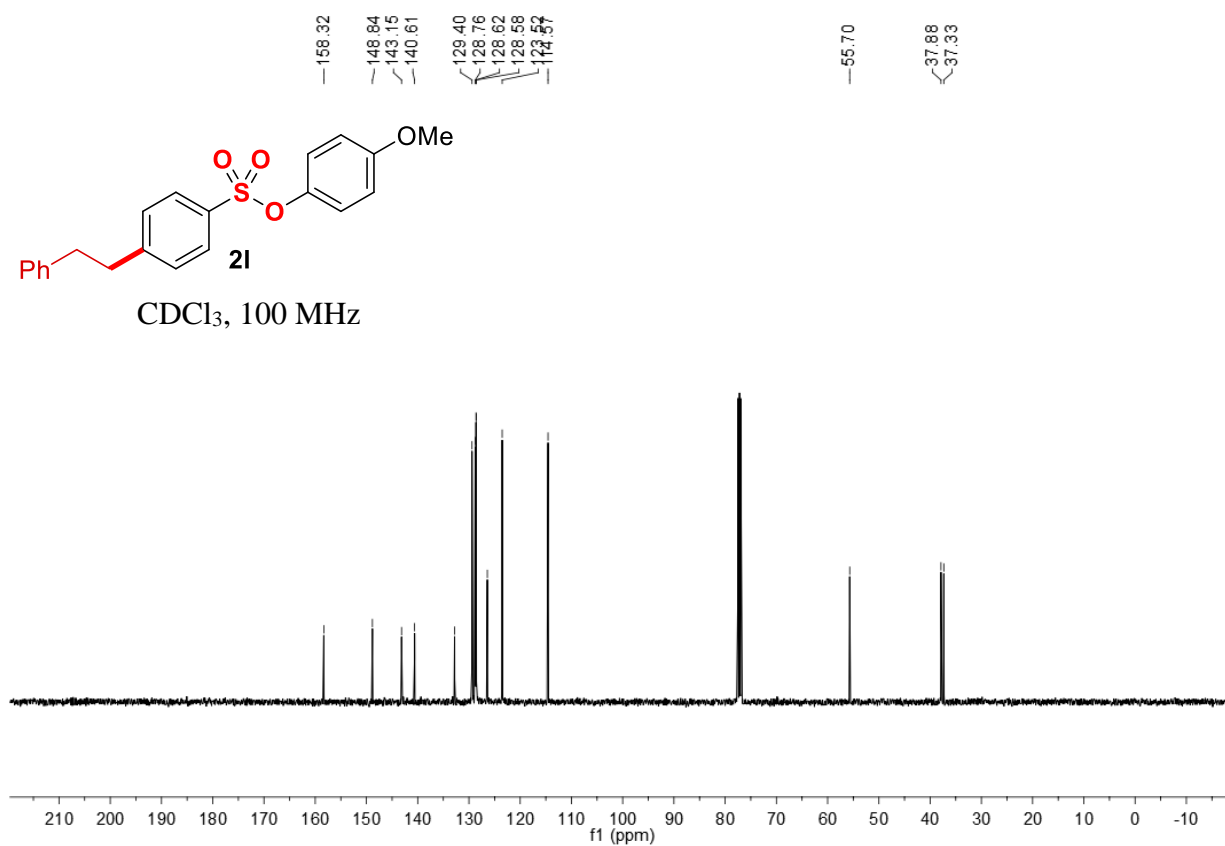

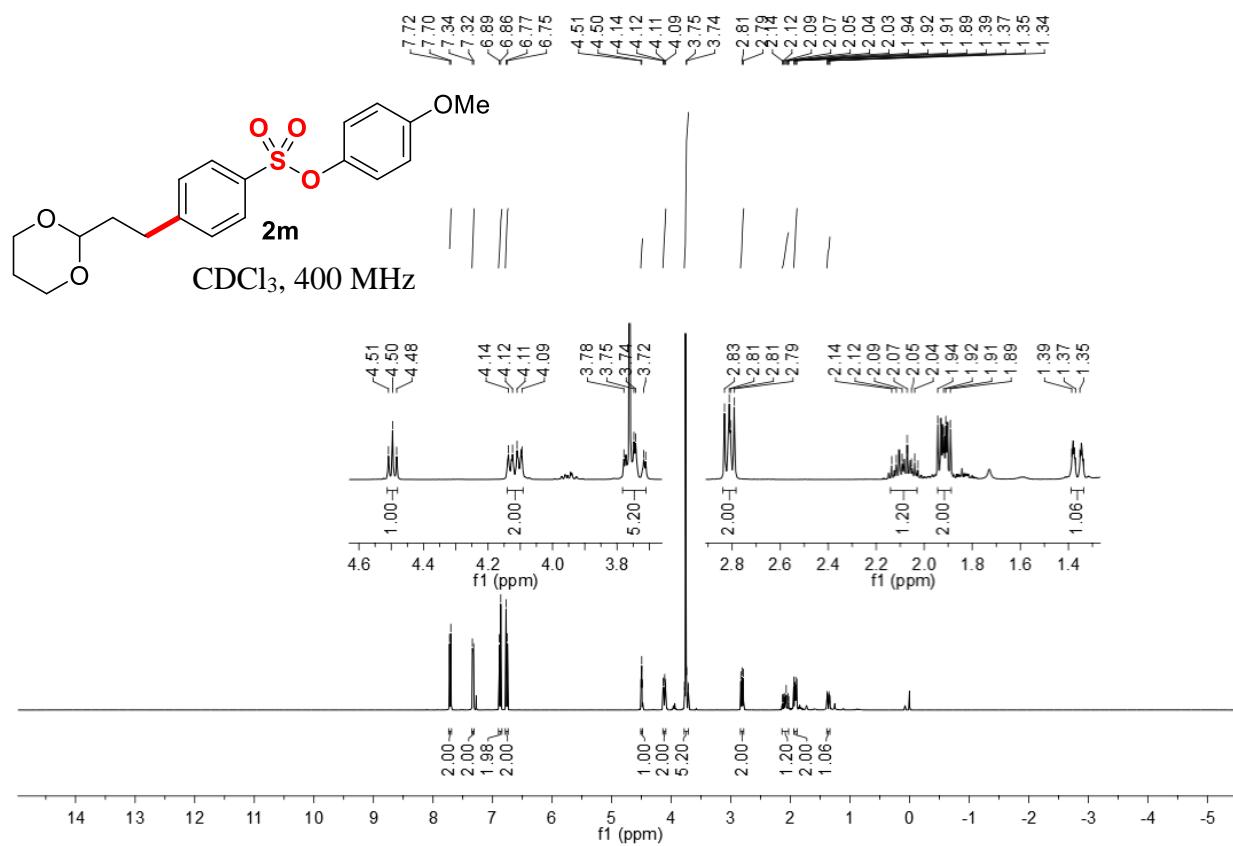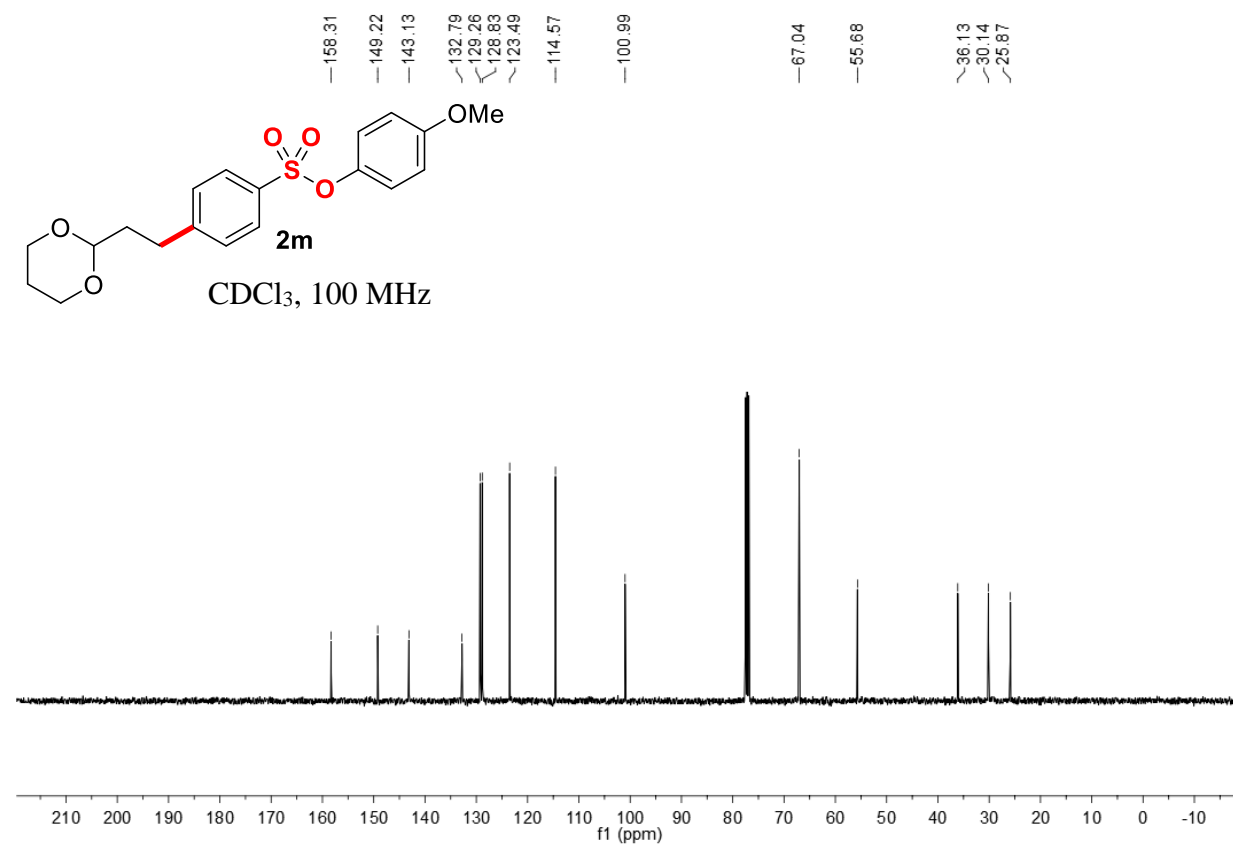

Supplement: s1 [file s1]
